# Supplementary material for: Opposing actions of co-released GABA and neurotensin on the activity of preoptic neurons and on body temperature
Source: eLife. 2024 Aug 29;13:RP98677. doi: 10.7554/eLife.98677 (PMC11361704; doi:10.7554/eLife.98677)
Supplement: Figure 1—source data 1. [file elife-98677-fig1-data1.xlsx]

## Sheet: Sheet1
	Figure 1		spontaneus firing rates				cell capacitance
		cell1	0.3				18.5
		cell2	3				15
		cell3	7.9				13.9
		cell4	5.2				19.3
		cell5	7.7				16.8
		cell6	2.3				20.7
		cell7	6.7				22
		cell8	4.1				19.7
		cell9	0.15				18.7
		cell10	4				18.9
		cell11	5.2				15.6
		cell12	6.1				17
		cell13	3.9				13.7
		cell14	7.2				15
		cell15	3.2				18
		cell16	4.5				19
		cell17	5.3				17
		cell18	6.5				22.6
		cell19	7.1				19
		cell20	2.2				15.3
		cell21	1.7				18.5
		cell22	0.16				19.3
