# Supplementary material for: Opposing actions of co-released GABA and neurotensin on the activity of preoptic neurons and on body temperature
Source: eLife. 2024 Aug 29;13:RP98677. doi: 10.7554/eLife.98677 (PMC11361704; doi:10.7554/eLife.98677)
Supplement: Figure 2—source data 1. — Change in firing rate in response to photostimulation. [file elife-98677-fig2-data1.xlsx]

## Sheet: Sheet1
Fig 2B data
							Gabazine+	Gabazine+		Gabazine +
		average		control (%)	photostim	Gabazine	photostim	NtsR1 antag		NtsR1 antag+
		firing rates			(%change)(%change)(%change)(%change)					photostim
			cell1	78.4314	38.1579	170	221	161		166
			cell2	101.961	22.4696	137.769	192.5	122.538		121.725
			cell3	119.608	32.1398	163.557	243.787	144.607		142.329
			cell4	76.4706	26.3158	133.649	167.254	131.538		136.667
			cell5	141.177	20.7602	184.778	183.222	161		165.556
			cell6	62.7451	40.625	163.75	217.975	148.5		141.25
			cell7	88.2353	22.4094	135.7	167.1	122.767		111.656
			cell8	103.922	35.7498	151.132	189.024	142.132		134.968
			cell9	127.451	17.004	141.615	126.2	110.6		101.5
