# Supplementary material for: Opposing actions of co-released GABA and neurotensin on the activity of preoptic neurons and on body temperature
Source: eLife. 2024 Aug 29;13:RP98677. doi: 10.7554/eLife.98677 (PMC11361704; doi:10.7554/eLife.98677)
Supplement: Figure 3—figure supplement 1—source data 1. [file elife-98677-fig3-figsupp1-data1.xlsx]

## Sheet: Sheet1
Fig 3 suppl
females
	IPSC freq (Hz)						inward currents (pA)
	cell1	2.1	18.4						12.5	1.1
	cell2	3.5	19.7						8.2	3.1
	cell3	1.2	16.3						11.7	2.5
	cell4	0.04	6.4						7.9	2.1
	cell5	0.5	9.6						16.22	4.2
