# Supplementary material for: Opposing actions of co-released GABA and neurotensin on the activity of preoptic neurons and on body temperature
Source: eLife. 2024 Aug 29;13:RP98677. doi: 10.7554/eLife.98677 (PMC11361704; doi:10.7554/eLife.98677)
Supplement: Figure 4—figure supplement 1—source data 1. [file elife-98677-fig4-figsupp1-data1.xlsx]

## Sheet: Sheet1
	Fig 4 suppl 1																							Fig 4 supplement
				Time (h)	F1	F2	F3	F4	F5	F6					Time (h)	F7	F8	F9	F10	F11	F12						Time (h)	F1	F2	F3	F4	F5	F6						Time (h)	F7	F8	F9	F10	F11	F12
		females											females												females											females
		MPO Nts eYFP		-1.9167	35.43	34.58	35.36	34.77	35.46	35.4			MPO Nts ChR2		-1.9167	35.81	35.44	35.29	35.06	35.68	34.96				MPO Nts Vgat-/-		-1.9167	35.42	35.11	35.29	35.78	35.68	35.2			MPO Nts Vgat-/-			-1.9167	35.02	35.5	35.45	35.24	35.57	35.76
		(control)		-1.8333	35.9	34.76	35.33	34.93	35.59	35.84					-1.8333	35.71	35.24	35.31	35.11	35.54	34.76				eYFP (control)		-1.8333	35.34	35.29	35.09	35.58	35.76	35			ChR2 (control)			-1.8333	35.6	35.29	35.45	35.38	35.15	35.89
				-1.75	35.75	34.76	35.39	34.9	35.7	35.65					-1.75	35.51	35.24	35.31	34.99	35.35	34.76						-1.75	35.82	35.29	35.09	35.58	35.6	35						-1.75	35.7	35.29	35.5	35.94	34.94	36.19
				-1.6667	35.83	34.85	35.53	34.94	35.6	35.74					-1.6667	35.04	35.24	35.58	34.79	35.35	34.74						-1.6667	35.5	35.38	34.99	35.58	35.06	34.9						-1.6667	35.4	35.29	35.35	35.88	34.92	36.08
				-1.5833	35.67	34.85	35.47	34.93	35.53	35.6					-1.5833	35.25	35.34	35.38	34.79	35.31	34.82						-1.5833	35.5	35.38	34.99	35.68	35.19	34.9						-1.5833	35.6	35.29	35.45	35.7	34.82	35.85
				-1.5	35.51	34.94	35.47	35.09	35.47	35.47					-1.5	35.14	35.34	35.38	34.74	35.38	34.82						-1.5	35.5	35.47	34.99	35.68	35.1	34.9						-1.5	35.29	35	35.15	35.64	34.64	35.36
				-1.4167	35.43	34.58	35.45	34.74	35.82	35.4					-1.4167	35.04	35.24	35.21	34.79	35.38	34.72						-1.4167	35.42	35.11	34.89	35.58	35.24	34.79						-1.4167	35	34.9	34.95	35.43	34.61	35.52
				-1.3333	35.9	34.76	35.68	34.89	35.47	35.84					-1.3333	35.25	35.54	36.15	34.79	35.28	35.18						-1.3333	35.42	35.29	35.69	35.88	35.19	35						-1.3333	34.79	34.79	34.79	35.38	34.72	35.5
				-1.25	35.59	34.76	35.33	34.89	35.54	35.51					-1.25	35.15	35.79	36.11	34.69	35.84	35.36						-1.25	35.34	35.29	35.59	36.14	35.19	35						-1.25	34.9	35	34.95	35.33	35.31	35.47
				-1.1667	35.59	34.76	35.45	34.86	35.54	35.54					-1.1667	34.95	35.79	35.94	35.36	35.97	35.32						-1.1667	35.34	35.29	35.39	36.14	35.15	35						-1.1667	35.1	34.9	35	35.77	35.7	35.58
				-1.0833	35.59	34.67	35.45	34.79	35.49	35.54					-1.0833	34.95	35.7	35.54	35.44	35.9	35.15						-1.0833	35.13	35.2	34.93	36.04	35.39	35.5						-1.0833	35.7	34.9	35.29	36.47	35.71	36.1
				-1	35.51	34.67	35.42	34.78	35.46	35.47					-1	34.85	35.6	35.69	35.34	35.68	35.11						-1	35.36	35.2	35.13	35.94	35.04	35.29						-1	35.79	35	35.4	36.29	35.43	36.45
				-0.9167	35.51	34.67	35.36	34.78	35.4	35.46					-0.9167	34.85	35.6	35.6	35.06	35.69	35.09						-0.9167	35.53	35.2	35.28	35.94	35.15	35.19						-0.9167	35.2	35	35.1	35.9	35.2	36.49
				-0.8333	35.43	34.58	35.33	34.72	35.4	35.39					-0.8333	34.85	35.24	35.47	35.11	35.65	34.78						-0.8333	35.45	35.11	35.19	35.58	35.15	35.1						-0.8333	35.29	35.2	35.25	36.06	35.08	36.47
				-0.75	35.43	34.58	35.33	34.77	35.43	35.39					-0.75	34.75	35.24	35.64	35.06	35.38	34.82						-0.75	35.29	35.11	35.39	35.58	35.13	35.29						-0.75	35.7	34.9	35.29	35.85	34.89	36.53
				-0.6667	35.51	34.76	35.29	34.95	35.59	35.44					-0.6667	35.04	35.34	35.47	34.84	35.45	34.86						-0.6667	35.13	35.29	35.19	35.68	35.07	35.1						-0.6667	36.04	34.6	35.33	35.43	34.83	36.49
				-0.5833	35.75	34.76	35.39	34.93	35.75	35.65					-0.5833	34.85	35.34	35.31	34.94	35.45	34.82						-0.5833	35.34	35.29	34.99	35.68	35.04	34.9						-0.5833	34.9	34.4	34.65	35.49	34.79	36.56
				-0.5	35.9	34.67	35.56	34.83	35.7	35.81					-0.5	34.85	35.24	35.29	34.89	35.38	34.74						-0.5	35.34	35.2	34.99	35.58	35.04	34.81						-0.5	34.79	34.5	34.65	35.49	35.38	35.74
				-0.4167	35.83	34.58	35.53	34.72	35.57	35.74					-0.4167	34.95	35.54	35.43	34.79	35.31	35						-0.4167	35.42	35.11	35.09	35.88	35.01	35.04						-0.4167	35	34.7	34.85	35.35	35.69	35.36
				-0.3333	35.67	34.67	35.42	34.78	35.43	35.59					-0.3333	34.95	35.34	35.4	34.74	35.54	34.84						-0.3333	35.54	35.2	35.09	35.68	35.1	34.9						-0.3333	35.7	35.29	35.5	35.74	36.04	35.29
				-0.25	35.51	34.49	35.29	34.64	35.4	35.44					-0.25	34.95	35.84	35.47	34.94	35.4	35.24						-0.25	35.38	35.02	35.09	36.18	35.27	35.24						-0.25	35.29	35.4	35.35	35.5	36.22	34.97
				-0.1667	35.43	34.31	35.33	34.51	35.35	35.39					-0.1667	35.45	35.44	35.84	34.84	35.74	35.02						-0.1667	35.46	34.84	35.59	35.78	35.24	35.15						-0.1667	35.2	34.5	34.85	35.34	36.7	34.9
				-0.0833	35.43	34.49	35.22	34.68	35.34	35.36					-0.0833	35.04	35.34	35.47	35.09	35.65	34.86						-0.0833	35.54	35.02	35.19	35.68	35.13	34.95						-0.0833	35.29	34.7	35	35.47	36.76	35.18
				0	35.51	34.4	35.13	34.57	35.47	35.4					0	35.15	35.34	35.57	35.14	35.45	34.88						0	35.61	34.93	34.99	35.68	35.01	34.88						0	35.7	35.1	35.4	35.34	36.72	35.21
				0.0833	35.63	34.79	35.29	34.9	35.34	35.53					0.0833	35.36	35.64	35.79	34.89	35.47	35.17						0.0833	35.61	35.33	35.21	35.97	35.04	35.15						0.0833	35.1	35.29	35.2	35.2	36.61	35.22
				0.1667	35.47	35.52	35.17	35.6	35.54	35.38					0.1667	35.67	35.64	36.06	34.94	35.76	35.22						0.1667	35.54	36.22	35.89	36.47	34.93	35.71						0.1667	35.9	35.1	35.5	34.9	35.94	34.72
				0.25	35.54	35.25	35.46	35.35	36.15	35.51					0.25	35.72	35.72	36.11	35.2	35.86	35.29						0.25	35.26	36.04	35.67	36.47	34.84	35.64						0.25	35.7	35	35.35	34.68	35.33	34.76
				0.3333	36.11	35.34	36.13	35.36	35.95	36.09					0.3333	35.54	36.14	36.03	35.35	35.93	35.6						0.3333	35.34	35.86	35.54	36.38	35	35.53						0.3333	34.79	34.4	34.6	34.52	34.81	34.69
				0.4167	35.95	34.79	35.9	34.95	35.78	35.92					0.4167	36.22	36.14	36.6	35.4	36.14	35.74						0.4167	35.34	35.33	35.59	36.33	34.88	35.51						0.4167	34.4	33.9	34.15	34.42	34.4	34.51
				0.5	35.63	34.79	35.84	34.95	35.64	35.65					0.5	36.11	36.58	36.58	35.54	36.38	36.07						0.5	35.42	35.33	35.65	36.28	35.17	35.5						0.5	34	33.79	33.9	34.28	34.27	34.36
				0.5833	35.71	34.71	35.52	34.86	35.64	35.65					0.5833	36.36	36.54	36.79	35.86	36.63	36.09						0.5833	35.34	35.24	35.74	36.11	35.79	35.42						0.5833	34.1	33.9	34	34.26	34.22	34.31
				0.6667	35.71	34.61	35.52	34.82	35.56	35.65					0.6667	36.33	36.28	36.71	36.04	36.69	35.86						0.6667	35.34	35.15	35.54	36.22	35.7	35.42						0.6667	34.4	33.9	34.15	34.1	34.07	34.33
				0.75	35.63	34.61	35.43	34.72	35.63	35.56					0.75	36.04	36.74	36.54	36.15	36.51	36.18						0.75	35.26	35.15	35.34	36.59	35.58	35.59						0.75	34	33.79	33.9	34.04	34.04	34.21
				0.8333	35.6	34.43	35.24	34.56	35.15	35.5					0.8333	35.84	36.57	36.31	36.19	36.9	36.34						0.8333	35.1	35.15	35.54	36.49	35.2	35.6						0.8333	34	34.4	34.2	34.03	34.06	34.29
				0.9167	35.15	34.43	35.09	34.56	35.2	35.11					0.9167	35.83	36.33	36.27	36.28	36.59	36.25						0.9167	35.02	35.15	35.54	36.19	35.1	35.4						0.9167	34.2	34.59	34.4	33.94	33.96	34.43
				1	35.24	34.43	35.11	34.57	35.2	35.19					1	35.77	36.61	36.26	35.99	36.43	36.07						1	35.02	35.15	35.64	36.09	35.07	35.36						1	34	34.74	34.36	33.86	34.01	34.71
				1.0833	35.24	34.43	35.11	34.56	35.26	35.19					1.0833	35.7	36.61	36.2	35.86	36.6	36.26						1.0833	35.26	35.24	35.64	35.99	35.02	35.31						1.0833	34	34.11	34.06	33.82	34	34.39
				1.1667	35.32	34.52	35.14	34.63	35.2	35.26					1.1667	35.75	36.79	36.27	35.97	36.58	36.21						1.1667	35.34	35.15	35.64	35.99	35.04	35.31						1.1667	34	34.4	34.2	33.89	33.96	34.25
				1.25	35.24	34.43	35.11	34.54	35.24	35.19					1.25	35.81	36.79	36.32	35.95	36.71	36.22						1.25	34.78	35.24	35.84	35.69	35.02	35.18						1.25	34	34.74	34.36	33.85	33.97	34.18
				1.3333	35.24	34.52	35.17	34.58	35.15	35.2					1.3333	35.9	36.4	36.35	36.06	36.72	36.32						1.3333	35.1	35.06	35.74	35.69	35.02	35.15						1.3333	34.4	34.9	34.65	33.7	34.47	34.22
				1.4167	35.15	34.34	35.09	34.42	35.08	35.11					1.4167	36.11	36.53	36.07	36.09	36.59	36.1						1.4167	35.72	35.6	35.54	35.69	34.99	35.08						1.4167	34.5	34.93	34.72	34.04	35.39	34.33
				1.5	35	34.88	35.09	34.85	34.97	35					1.5	35.7	35.89	36.07	36	36.54	35.77						1.5	35.76	35.86	35.64	35.79	34.99	35.18						1.5	34.9	35	34.95	34.54	35.11	34.24
				1.5833	34.92	35.15	34.95	34.85	35.15	34.9					1.5833	35.79	35.77	35.9	36.04	36.11	35.93						1.5833	35.82	35.86	35.44	35.59	34.9	34.97						1.5833	35.4	34.79	35.1	34.94	34.78	34.33
				1.6667	34.92	35.34	35.49	34.85	35.4	35.18					1.6667	35.7	36.08	36.07	35.97	36.17	35.77						1.6667	35.5	35.77	35.04	35.59	34.96	34.84						1.6667	35.6	35.1	35.35	35.32	34.64	34.47
				1.75	35.35	35.07	35.75	34.85	35.65	35.42					1.75	35.51	36.15	36.18	35.83	35.64	35.6						1.75	35.34	35.6	35.54	35.69	34.93	35.08						1.75	35.6	35.29	35.45	35.34	34.54	34.47
				1.8333	35.43	35.07	35.77	34.85	35.19	35.49					1.8333	35.31	36.24	36.03	35.34	36.33	35.83						1.8333	35.18	35.15	35.54	36.19	35.31	35.4						1.8333	35.6	35.4	35.5	35.81	34.36	34.42
				1.9167	34.86	34.89	35.4	34.85	35.4	34.97					1.9167	35.31	36	35.76	35.71	36.14	35.39						1.9167	35.18	35.86	35.54	35.68	35.29	35.07						1.9167	35.79	35.64	35.72	36.04	34.49	34.4
				2	35.19	35.03	35.51	34.85	35.59	35.24					2	35.31	35.89	35.95	35.65	35.96	35.39						2	35.18	35.86	35.45	35.68	35.4	35.04						2	35.9	35.79	35.85	35.53	34.6	35.22
				2.0833	35.59	35.34	35.54	34.85	35.88	35.56					2.0833	35.7	35.79	36.1	35.38	35.96	35.36						2.0833	35.18	36.04	35.35	36.18	35.54	35.33						2.0833	35.9	35.79	35.85	35.5	34.79	35.29
				2.1667	35.95	35.25	35.76	34.85	35.97	35.88					2.1667	35.6	36.43	36.11	35.38	35.97	35.85						2.1667	35.74	36.04	35.15	35.97	35.46	35.13						2.1667	36	35.9	35.95	35.21	34.94	35.11
				2.25	35.95	34.89	35.96	34.85	35.79	35.93					2.25	35.4	35.65	35.82	35.44	36.35	35.18						2.25	35.74	35.78	35.35	35.86	35.18	35.13						2.25	36.1	35.79	35.95	35.22	35.04	34.88
				2.3333	35.71	34.97	35.81	34.85	35.28	35.71					2.3333	35.5	35.75	35.92	35.7	35.77	35.28						2.3333	35.82	35.78	35.45	35.78	35.54	35.1						2.3333	36	35.7	35.85	35.97	35.06	34.84
				2.4167	35.11	35.34	35.36	34.85	35.52	35.15					2.4167	35.29	35.54	35.72	35.21	35.86	35.08						2.4167	35.74	35.02	35.25	35.97	35.47	35.15						2.4167	35.5	36	35.75	36.2	36.13	34.72
				2.5	35.43	35.34	35.54	34.85	35.85	35.43					2.5	35.29	35.65	35.74	35.31	35.67	35.15						2.5	35.82	35.02	35.25	35.58	35.54	34.9						2.5	35.4	35.79	35.65	36.47	36.33	34.56
				2.5833	35.75	35.52	35.89	34.85	35.96	35.76					2.5833	35.29	35.45	35.71	35.11	35.74	35						2.5833	35.65	35.02	35.15	35.58	35.54	34.86						2.5833	35.54	36.25	35.7	36.75	36.01	34.45
				2.6667	35.9	35.52	35.94	34.85	35.81	35.9					2.6667	35.2	35.45	35.61	35.15	35.61	34.97						2.6667	35.61	35.02	35.25	35.58	35.36	34.9						2.6667	35.45	36.08	35.57	36.74	36.26	34.44
				2.75	35.59	35.25	35.95	34.85	35.71	35.65					2.75	35.29	35.35	35.69	35.06	35.57	34.92						2.75	35.86	35.02	35.15	35.58	35.36	34.86						2.75	35.65	36.07	35.65	36.53	36.61	34.51
				2.8333	35.43	35.25	35.89	34.85	35.51	35.52					2.8333	35.29	35.35	35.69	35.01	35.54	34.92						2.8333	35.7	35.29	35.15	35.88	35.07	35.06						2.8333	35.75	35.97	35.65	36.65	36.81	34.21
				2.9167	35.27	34.49	35.65	34.85	35.51	35.34					2.9167	35.5	35.35	35.86	35.01	35.54	34.96						2.9167	35.46	35.38	35.04	36.28	35.07	35.29						2.9167	35.75	35.45	35.4	36.35	36.79	34.29
				3	35.27	34.49	35.65	34.85	35.24	35.34					3	35.7	35.25	36.02	35.01	35.61	34.92						3	35.46	35.11	35.15	35.97	35.1	35.13						3	35.85	35.85	35.65	36.47	35.67	34.29
				3.0833	35.27	34.49	35.15	34.85	35.5	35.22					3.0833	35.4	35.34	35.79	35.11	35.61	34.94						3.0833	35.29	35.02	35.15	36.56	35.07	35.51						3.0833	35.75	35.75	35.54	36.75	35.95	34.86
				3.1667	35.67	34.49	35.29	34.85	35.24	35.56					3.1667	35.4	35.34	35.79	35.15	35.57	34.94						3.1667	35.29	35.11	34.68	36.08	35.1	35.03						3.1667	35.85	35.65	35.54	36.74	35.94	34.96
				3.25	35.27	34.49	35.15	34.85	35.61	35.22					3.25	35.31	35.34	35.7	35.06	35.57	34.92						3.25	35.38	34.77	34.68	36.6	35.22	35.36						3.25	36.04	35.7	35.6	36.22	36.08	34.68
				3.3333	35.83	34.67	35.36	34.85	35.61	35.7					3.3333	35.21	35.84	35.69	35.06	35.54	35.29						3.3333	35.7	35.31	35.47	36.29	35.26	35.45						3.3333	35.4	35.45	35.4	36.26	36.21	34.27
				3.4167	35.83	34.58	35.36	34.85	35.67	35.7					3.4167	35.01	35.64	35.49	35.01	35.83	35.1						3.4167	35.7	35.58	35.52	36	35.17	35.27						3.4167	35.5	35.4	35.45	36.35	36.35	34.25
				3.5	35.83	34.49	35.47	34.85	35.64	35.72					3.5	35.21	35.53	35.65	35.21	35.63	35.04						3.5	35.86	35.58	35.79	36.25	35.04	35.53						3.5	35.6	35.6	35.6	36.04	36.04	34.25
				3.5833	35.83	34.76	35.42	34.85	35.65	35.71					3.5833	35.31	35.44	35.72	35.01	35.63	35						3.5833	35.86	35.31	35.95	36.25	35.03	35.59						3.5833	35.6	35.36	35.49	35.79	35.79	34.11
				3.6667	35.9	34.85	35.39	34.85	35.7	35.77					3.6667	35.11	35.64	35.58	35.06	35.6	35.11						3.6667	35.61	35.31	36.08	36.15	34.81	35.57						3.6667	35.6	35.36	35.49	37.59	36.47	34.11
				3.75	35.83	34.58	35.53	34.85	35.79	35.74					3.75	35.11	35.44	35.54	35.06	35.65	34.96						3.75	35.61	35.13	35.93	36.15	35.1	35.52						3.75	35.79	35.47	35.64	36.81	36.75	34.27
				3.8333	35.9	34.49	35.61	34.85	35.59	35.82					3.8333	35.11	35.24	35.52	35.06	35.53	34.79						3.8333	35.46	35.13	35.89	36.15	35.28	35.5						3.8333	35.79	35.47	35.64	37.06	36.74	34.08
				3.9167	35.75	34.58	35.39	34.85	35.53	35.65					3.9167	35.01	35.24	35.43	34.96	35.4	34.78						3.9167	35.46	35.22	35.93	36.04	35.31	35.45						3.9167	35.79	35.67	35.74	37.42	36.53	34.9
				4	35.71	34.24	35.32	34.85	35.72	35.6					4	35.11	35.24	35.52	34.86	35.36	34.79						4	35.29	35.58	35.63	36.04	35.24	35.35						4	35.7	34.5	35.1	36.35	36.65	35.18
				4.0833	35.95	34.78	35.46	34.85	35.49	35.82					4.0833	35.11	35.34	35.53	34.81	35.4	34.88						4.0833	35.5	35.58	35.63	36.15	35.24	35.4						4.0833	35.9	34.5	35.2	36.47	36.35	35.53
				4.1667	35.79	35.04	35.18	34.85	35.53	35.63					4.1667	35.01	35.34	35.45	34.86	35.47	34.86						4.1667	36.26	35.76	35.63	35.95	35.18	35.28						4.1667	35.6	35.17	35.39	36.75	36.04	35.43
				4.25	35.54	35.04	35.45	34.85	35.61	35.51					4.25	35.01	35.24	35.43	34.9	35.43	34.78						4.25	36.26	35.97	35.63	35.95	35.18	35.28						4.25	35.4	35.07	35.24	36.53	35.79	35.43
				4.3333	35.54	34.78	35.61	34.85	35.52	35.54					4.3333	35.01	35.54	35.47	34.86	35.36	35.02						4.3333	36.1	35.97	35.63	36.22	35.15	35.46						4.3333	35.29	35.27	35.29	36.65	36.35	35.53
				4.4167	35.39	34.78	35.57	34.85	35.42	35.4					4.4167	34.9	35.94	35.45	34.81	35.56	35.32						4.4167	36.26	35.71	35.53	36.54	35.39	35.64						4.4167	35.29	35.27	35.29	36.35	36.47	35.33
				4.5	35.39	34.6	35.39	34.85	35.47	35.36					4.5	35.01	35.64	35.49	34.96	35.79	35.1						4.5	36.06	35.31	35.43	36.54	35.33	35.6						4.5	35.5	34.97	35.24	36.04	36.75	35.33
				4.5833	35.47	34.6	35.42	34.85	35.61	35.44					4.5833	35.01	36.22	35.58	35.11	35.63	35.56						4.5833	36.46	35.58	35.72	36.75	35.45	35.83						4.5833	35.4	35.27	35.34	35.79	36.53	35.61
				4.6667	35.79	34.69	35.42	34.85	35.61	35.68					4.6667	34.9	35.74	35.45	35.01	36.01	35.08						4.6667	36.29	35.58	35.84	36.78	35.54	35.89						4.6667	35.2	35.27	35.24	36.65	36.65	35.93
				4.75	35.79	35.04	35.42	34.85	35.76	35.68					4.75	35.01	36.26	35.49	35.29	35.53	35.5						4.75	36.42	36.29	35.84	37.15	35.61	36.13						4.75	35.1	35.67	35.39	36.35	36.35	35.93
				4.8333	35.95	35.04	35.53	34.85	35.88	35.83					4.8333	35.34	35.96	35.82	34.83	35.86	35.42						4.8333	36.06	36.29	35.9	37.15	35.7	36.15						4.8333	35.1	35.57	35.34	35.57	35.34	36.13
				4.9167	35.95	35.22	35.76	34.85	35.72	35.89					4.9167	35.38	35.65	35.81	35.09	35.95	35.19						4.9167	36.06	35.76	35.9	37.35	35.44	36.29						4.9167	35.4	35.57	35.49	35.4	35.49	36.15
				5	35.71	35.45	35.68	34.85	35.79	35.68					5	35.65	35.9	36.09	35.34	35.77	35.44						5	36.06	35.58	36.29	37.35	35.56	36.4						5	35.29	35.36	35.34	36.53	35.34	36.53
