# Supplementary material for: Opposing actions of co-released GABA and neurotensin on the activity of preoptic neurons and on body temperature
Source: eLife. 2024 Aug 29;13:RP98677. doi: 10.7554/eLife.98677 (PMC11361704; doi:10.7554/eLife.98677)
Supplement: Figure 5—figure supplement 1—source data 1. [file elife-98677-fig5-figsupp1-data1.xlsx]

## Sheet: Sheet1
Fg 5 Supplement
		control										Nts VGAT-/-
					VGAT positive		Nts positive		double positive					cells expressing		cell expressing Nts			cells expressing both
														VGAT
					7		3		3					4		4			0
					5		3		2					3		2			0
					9		5		5					4		6			1
					10		5		5					5		4			1
					11		4		4					7		4			0
					12		8		7					6		8			0
					7		3		3					4		2			0
					9		5		5					4		5			0
					5		3		3					2		2			0
					8		4		4					4		4			0
					8		4		4					4		3			1
					11		7		7					6		7			0
					4		3		3					3		2			0
					5		2		1					5		5			0
					6		2		2					2		2			0
					7		4		3					4		4			0
					7		4		4					3		4			0
					8		3		3					5		4			0
