# Supplementary material for: Opposing actions of co-released GABA and neurotensin on the activity of preoptic neurons and on body temperature
Source: eLife. 2024 Aug 29;13:RP98677. doi: 10.7554/eLife.98677 (PMC11361704; doi:10.7554/eLife.98677)
Supplement: Figure 5—source data 1. [file elife-98677-fig5-data1.xlsx]

## Sheet: Sheet1
Fig 5B											Fig 5C
		percentage change in firing rate relative to control									inward current (pA)
			ctrl	photostim		photostim+NtsR1 antag					photostim		photostim+NtsR1 antag
		cell1	97.0711	208.621		98.2759				cell1	169.565		5.985
		cell2	38.4937	169.565		60.8696				cell2	208.621		15.105
		cell3	130.544	191.026		105.128				cell3	191.026		17.1
		cell4	88.7029	307.547		90.566				cell4	307.547		16.245
		cell5	108.787	172.308		106.154				cell5	172.308		20.52
		cell6	92.0502	296.364		94.5455				cell6	296.364		23.085
		cell7	102.092	155.738		104.918				cell7	155.738		14.82
		cell8	82.0084	230.612		106.122				cell8	230.612		17.1
		cell9	133.891	215		117.5				cell9	215		16.245
		cell10	132.218	179.747		88.6076				cell10	179.747		23.085
		cell11	118.829	191.549		112.676				cell11	191.549		21.375
		cell12	75.3138	266.667		111.111				cell12	266.667		19.665
Fg 5 Supplement
		control										Nts VGAT-/-
					VGAT positive		Nts positive		double positive					cells expressing		cell expressing Nts			cells expressing both
														VGAT
					7		3		3					4		4			0
					5		3		2					3		2			0
					9		5		5					4		6			1
					10		5		5					5		4			1
					11		4		4					7		4			0
					12		8		7					6		8			0
					7		3		3					4		2			0
					9		5		5					4		5			0
					5		3		3					2		2			0
					8		4		4					4		4			0
					8		4		4					4		3			1
					11		7		7					6		7			0
					4		3		3					3		2			0
					5		2		1					5		5			0
					6		2		2					2		2			0
					7		4		3					4		4			0
					7		4		4					3		4			0
					8		3		3					5		4			0
