# Supplementary material for: Opposing actions of co-released GABA and neurotensin on the activity of preoptic neurons and on body temperature
Source: eLife. 2024 Aug 29;13:RP98677. doi: 10.7554/eLife.98677 (PMC11361704; doi:10.7554/eLife.98677)
Supplement: Figure 6—source data 1. [file elife-98677-fig6-data1.xlsx]

## Sheet: Sheet1
Fig 6A
		Nts-GAT-/-		Time (h)		M1	M2	M3	M4	M5	M6			Nts-GAT+/+		Time (h)		M7	M8	M9	M10	M11	M12
														(control)
				-1.9167		36.2	35.6	35.2	35.75	35.39	35.47					-1.9167		35.6	35.8	35.8	35.75	35.67	35.27
				-1.8333		36.3	35.4	35.2	35.625	35.34	35.53					-1.8333		35.7	35.9	35.9	35.65	35.66	35.49
				-1.75		36.3	35.5	35	35.7	35.24	35.46					-1.75		35.3	35.8	35.8	35.77	35.74	35.2
				-1.6667		36.6	35.7	35	35.925	35.32	35.66					-1.6667		35.3	36	36	35.77	35.87	35.27
				-1.5833		36.6	35.4	35.1	35.7	35.31	35.69					-1.5833		35.7	35.5	35.5	35.91	35.54	35.35
				-1.5		36.5	35.1	35	35.45	35.15	35.59					-1.5		35.3	35.8	35.8	35.45	35.56	35.2
				-1.4167		36.2	35	35.4	35.3	35.36	35.54					-1.4167		35.3	35.7	35.7	35.38	35.46	35.16
				-1.3333		36.1	35.6	35.1	35.725	35.31	35.37					-1.3333		35.3	35.4	35.4	35.38	35.27	35.06
				-1.25		36.1	35.6	35.7	35.725	35.7	35.58					-1.25		35.4	35.4	35.4	35.06	35.09	35.06
				-1.1667		36.1	35.4	35.6	35.575	35.59	35.54					-1.1667		35.3	35.7	35.7	35.02	35.29	35.1
				-1.0833		35.8	35	35.5	35.2	35.39	35.31					-1.0833		35.3	36	36	35.32	35.62	35.27
				-1		35.7	35	35.3	35.175	35.25	35.18					-1		35.2	36	36	35.61	35.8	35.2
				-0.9167		35.5	35	35.2	35.125	35.17	35.01					-0.9167		35.3	36	36	35.54	35.76	35.2
				-0.8333		35.4	34.8	35.2	34.95	35.11	34.95					-0.8333		35.2	35.9	35.9	35.67	35.77	35.17
				-0.75		35.4	34.8	35	34.95	34.98	34.88					-0.75		35.2	35.9	35.9	35.71	35.77	35.23
				-0.6667		35.3	35.1	35	35.15	35.05	34.81					-0.6667		35.2	35.7	35.7	35.74	35.64	35.23
				-0.5833		35	35.1	35.1	35.075	35.09	34.65					-0.5833		35.3	35.6	35.6	35.85	35.57	35.39
				-0.5		35.9	35.5	35	35.6	35.21	35.2					-0.5		35.4	35.4	35.4	35.72	35.37	35.32
				-0.4167		36	35.7	34.9	35.775	35.2	35.23					-0.4167		35.7	35.4	35.4	35.62	35.3	35.38
				-0.3333		35.7	35.8	34.9	35.775	35.2	35.04					-0.3333		35.7	35.3	35.3	35.65	35.27	35.28
				-0.25		35.6	35.8	35	35.75	35.26	35.01					-0.25		35.8	35.5	35.5	35.72	35.44	35.35
				-0.1667		35.6	35.8	35.1	35.75	35.32	35.04					-0.1667		35.7	35.5	35.5	35.52	35.37	35.22
				-0.0833		35.5	35.6	35.1	35.575	35.26	34.98					-0.0833		35.7	36.1	36.1	35.73	35.76	35.82
				0		35.3	35.3	35.4	35.3	35.36	34.95					0		35.5	36.2	36.2	35.86	35.86	35.99
				0.0833		35.3	35.2	35.5	35.225	35.4	34.99					0.0833		35.7	35.72	35.9	35.8	35.59	36.01
				0.1667		35.1	35.3	35.4	35.25	35.34	34.82					0.1667		35.7	36.02	36.3	36	35.7	36.01
				0.25		35.1	35.2	35.4	35.175	35.32	34.82					0.25		35.8	36.02	36.1	35.96	35.57	35.88
				0.3333		35.1	35	35.1	35.025	35.07	34.72					0.3333		35.5	35.82	35.8	35.94	35.3	35.97
				0.4167		35.7	35	35.2	35.175	35.19	35.14					0.4167		36.1	36.42	35.8	36.33	35.51	35.97
				0.5		36.4	36.4	35.2	36.4	35.62	35.6					0.5		36.9	36.82	35.6	35.94	35.52	36.03
				0.5833		36.3	37.1	35.4	36.9	35.92	35.6					0.5833		36.8	36.42	35.7	36.33	35.66	36
				0.6667		36.3	37.2	37.1	36.975	37.05	36.2					0.6667		37.1	36.82	37	36.66	35.7	36.39
				0.75		37.1	37.58	37.8	37.46	37.68	36.96					0.75		37.1	37.32	37	36.95	35.57	36.45
				0.8333		38.2	37.48	37.8	37.66	37.75	37.68					0.8333		37.3	38.12	37.6	37.54	37.28	36.79
				0.9167		38.4	37.28	37.7	37.56	37.65	37.77					0.9167		37.2	38.42	37.3	37.77	37.19	36.75
				1		38.4	37.38	37.7	37.635	37.67	38.08					1		37.1	38.52	37.5	37.8	37.35	37.26
				1.0833		38.3	37.38	37.8	37.61	37.73	38.05					1.0833		37.2	38.62	37.7	37.9	37.52	37.39
				1.1667		37.8	37.38	37.7	37.485	37.62	37.69					1.1667		37.4	38.52	37.8	37.9	37.55	37.56
				1.25		37.7	37.48	37.7	37.535	37.64	37.63					1.25		37.5	37.92	37.8	37.51	37.34	37.56
				1.3333		37.5	37.58	37.7	37.56	37.65	37.5					1.3333		37.4	37.62	37.6	37.32	37.1	37.49
				1.4167		37.3	37.48	37.7	37.435	37.6	37.06					1.4167		37.5	37.52	37.1	37.18	36.74	37.18
				1.5		37.4	37.68	37.6	37.61	37.6	37.09					1.5		37.7	37.62	37.1	37.28	36.78	37.25
				1.5833		37.5	37.68	37.7	37.635	37.67	37.19					1.5833		37.7	37.52	36.9	37.22	36.61	37.18
				1.6667		37.4	37.38	37.8	37.385	37.65	37.16					1.6667		37.7	37.62	36.9	37.25	36.65	37.11
				1.75		37	37.38	37.8	37.285	37.61	36.9					1.75		37.5	37.42	36.8	37.08	36.51	37.01
				1.8333		36.8	37.48	37.8	37.31	37.62	36.77					1.8333		37.6	37.32	36.8	36.98	36.48	36.95
				1.9167		36.8	37.48	37.7	37.31	37.56	36.73					1.9167		37.6	37.22	36.9	36.95	36.51	37.05
				2		36.9	37.58	37.7	37.41	37.59	36.8					2		37.5	37.12	36.9	36.89	36.47	37.05
				2.0833		37.1	37.18	37.6	37.16	37.44	36.89					2.0833		37.4	37.12	37	36.82	36.54	36.95
				2.1667		37.1	37.18	37.6	37.16	37.44	36.89					2.1667		37.3	37.12	37.1	36.82	36.6	36.99
				2.25		36.9	37.08	37.6	37.035	37.4	36.76					2.25		37.4	37.12	37.2	36.82	36.67	37.02
				2.3333		37.1	36.98	37.6	37.01	37.39	36.89					2.3333		37.4	37.02	37.5	36.72	36.83	37.06
				2.4167		37.1	36.68	37.6	36.785	37.31	36.89					2.4167		37.2	37.02	37.5	36.68	36.83	37
				2.5		37.1	36.78	37.5	36.86	37.27	36.86					2.5		37.2	37.02	37.6	36.61	36.89	36.9
				2.5833		37.1	36.58	37.4	36.71	37.15	36.82					2.5833		37.2	36.92	37.7	36.62	36.92	37.07
				2.6667		37	36.38	37.3	36.535	37.03	36.72					2.6667		37.1	37.02	37.7	36.79	36.96	37.26
				2.75		36.6	36.48	37	36.51	36.82	36.36					2.75		37	36.92	37.7	36.72	36.92	37.26
				2.8333		36.6	36.28	36.8	36.36	36.64	36.29					2.8333		36.8	36.92	37.7	36.62	36.92	37.07
				2.9167		36.5	36.38	36.7	36.41	36.59	36.19					2.9167		37	36.92	37.7	36.62	36.92	37.07
				3		36.4	36.2	36.5	36.25	36.41	36.05					3		37.3	37.02	37.5	36.75	36.83	37.13
				3.0833		36.3	36.1	36.3	36.15	36.24	35.92					3.0833		37.3	37.12	37.5	36.89	36.86	37.26
				3.1667		36.1	35.9	36	35.95	35.98	35.68					3.1667		37	37.12	37.6	36.89	36.93	37.29
				3.25		36.1	35.8	36	35.875	35.95	35.68					3.25		37	37.12	37.5	36.85	36.86	37.19
				3.3333		36.2	35.8	35.9	35.9	35.9	35.71					3.3333		37.2	37.02	37.5	36.72	36.83	37.06
				3.4167		36.2	35.7	36	35.825	35.93	35.75					3.4167		37.4	37.02	37.6	36.72	36.89	37.1
				3.5		36.1	35.7	35.8	35.8	35.8	35.61					3.5		37.4	37.12	37.6	36.82	36.93	37.16
				3.5833		36	35.5	35.7	35.625	35.67	35.51					3.5833		37.3	37.12	37.6	36.82	36.93	37.16
				3.6667		35.9	35.5	35.5	35.6	35.53	35.38					3.6667		37.1	37.02	37.6	36.75	36.89	37.16
				3.75		35.9	35.5	35.4	35.6	35.47	35.34					3.75		37.1	37.12	37.6	36.82	36.93	37.16
				3.8333		36	35.5	35.4	35.625	35.47	35.41					3.8333		37.2	36.82	37.5	36.62	36.76	37.13
				3.9167		36	35.8	35.7	35.85	35.75	35.51					3.9167		37.2	36.92	37.3	36.62	36.66	36.93
				4		35.8	35.9	35.7	35.875	35.76	35.38					4		37.2	36.92	37.2	36.65	36.6	36.96
				4.0833		36	36	35.9	36	35.93	35.58					4.0833		37.2	37.02	37.3	36.65	36.7	36.86
				4.1667		36	36.1	36	36.075	36.02	35.62					4.1667		37.2	37.02	37.4	36.65	36.76	36.9
				4.25		35.9	36	36	35.975	35.99	35.55					4.25		37	36.92	37.2	36.58	36.6	36.83
				4.3333		35.8	36.1	36.2	36.025	36.13	35.56					4.3333		37.1	37.02	37.2	36.65	36.63	36.83
				4.4167		35.7	36.1	36.2	36	36.13	35.49					4.4167		36.9	37.52	37.1	36.94	36.74	36.73
				4.5		35.7	36.1	36.2	36	36.13	35.49					4.5		36.9	37.42	37.1	36.87	36.71	36.73
				4.5833		35.8	36.1	36.5	36.025	36.33	35.66					4.5833		36.9	37.12	37.2	36.71	36.67	36.83
				4.6667		35.7	36	36.5	35.925	36.29	35.6					4.6667		36.9	36.92	37.2	36.58	36.6	36.83
				4.75		35.8	35.9	36.6	35.875	36.34	35.7					4.75		36.8	36.92	37.2	36.55	36.6	36.76
				4.8333		35.8	35.9	36.7	35.875	36.41	35.73					4.8333		36.8	37.32	37	36.81	36.61	36.69
				4.9167		35.7	36	36.8	35.925	36.49	35.7					4.9167		36.9	37.12	37	36.68	36.54	36.69
				5		35.9	35.9	36.7	35.9	36.42	35.8					5		36.9	37.12	37	36.64	36.54	36.63
				5.0833		35.8	36.1	36.8	36.025	36.52	35.77					5.0833		36.8	37.02	37	36.58	36.5	36.63
				5.1667		35.9	36.1	36.8	36.05	36.53	35.83					5.1667		36.8	37.32	37.1	36.77	36.67	36.66
				5.25		35.9	35.9	36.7	35.9	36.42	35.83					5.25		36.8	36.92	37.2	36.58	36.6	36.83
				5.3333		36	35.7	36.8	35.775	36.44	35.83					5.3333		36.7	37.02	37.3	36.72	36.7	36.99
				5.4167		36	35.8	36.8	35.85	36.46	35.83					5.4167		36.7	37.12	37.3	36.68	36.73	36.8
				5.5		36.2	35.9	36.6	35.975	36.38	35.83					5.5		36.7	37.02	37.4	36.65	36.76	36.9
				5.5833		36.5	35.9	36.6	36.05	36.4	35.83					5.5833		36.9	37.177	37.4	36.62	36.82	36.77
				5.6667		36.6	36.1	36.5	36.225	36.4	35.83					5.6667		37.1	37.102	37.4	36.52	36.42	37.16
				5.75		36.6	35.9	36.4	36.075	36.28	35.83					5.75		36.8	37.202	37.4	36.82	36.52	37.35
				5.8333		36.5	35.8	36.4	35.975	36.25	35.83					5.8333		36.9	37.237	37.5	36.42	36.62	37.39
				5.9167		36.5	35.5	36.6	35.75	36.2	35.83					5.9167		36.7	37.267	37.5	36.52	36.52	37.39
Fig 6B			Nts-GAT-/-		Time (h)		M1	M2	M3	M4	M5	M6				Nts-GAT+/+		Time (h)		M7	M8	M9	M10	M11	M12
																(control)
					-0.5		36.9	37.4	36.2	37.17	36.795	36.65						-0.5		37.47	37.4	37.2	37.02	37.35	37.53
					-0.4167		37.1	37.4	36	37.26	36.935	36.71						-0.4167		37.37	36.9	37.1	36.88	37.24	37.21
					-0.3333		37.18	37.3	36	37.24	37.003	36.76						-0.3333		37.3	36.9	37.3	36.99	37.25	37.08
					-0.25		37.7	37	36.6	37.31	37.535	37.31						-0.25		37.02	36.9	37.3	36.94	37.07	36.85
					-0.1667		37.2	36.5	36.7	36.81	37.125	37.02						-0.1667		37.22	36.8	37.5	37.05	37.25	36.89
					-0.0833		37.6	36.5	36.8	36.99	37.48	37.32						-0.0833		37.13	36.8	37.3	36.94	37.14	36.89
					0		37.7	36.6	36.8	37.09	37.565	37.38						0		37.18	37.2	37.4	37	37.19	37.11
					0.0833		37.6	36.4	36.3	36.94	37.405	37.14						0.0833		37.29	37.2	37.4	37.27	37.33	37.2
					0.1667		37.7	38.1	36.3	37.92	37.49	37.21						0.1667		37.38	37.9	37.6	37.38	37.44	37.58
					0.25		37.8	38.8	39.1	38.35	37.995	38.25						0.25		37.57	38.6	37.9	37.59	37.65	38.01
					0.3333		37.8	39.2	39.8	38.57	38.1	38.5						0.3333		37.88	38.8	38.6	37.93	38.02	38.12
					0.4167		38.2	39.5	40	38.91	38.5	38.9						0.4167		38.59	39.2	39.2	38.44	38.67	38.7
					0.5		38.8	39.6	40	39.45	39.45	39.7						0.5		38.67	39.2	39.5	38.6	38.8	38.66
					0.5833		39.7	39.8	40.1	39.75	39.76	39.84						0.5833		38.83	40	39.6	38.84	38.97	39.19
					0.6667		39.8	39.95	39.7	39.9	39.87	40.3						0.6667		38.98	39.9	39.7	38.98	39.11	39.22
					0.75		40.1	40.2	40.28	39.8	39.95	39.7						0.75		39.28	40.3	40	39.37	39.43	39.58
					0.8333		40.5	40.1	40.2	40.28	40.455	40.39						0.8333		39.43	40.3	40.2	39.57	39.6	39.62
					0.9167		40.7	40.4	40.6	40.53	40.685	40.66						0.9167		39.89	40.3	40.5	39.83	39.99	39.89
					1		40.9	40.6	40.7	40.73	40.87	40.83						1		39.95	40.5	40.5	39.87	40.03	40.05
					1.0833		41.1	40.8	40.7	40.93	41.04	40.96						1.0833		40.28	40.5	40.5	40.1	40.29	40.32
					1.1667		41.4	40.9	41	41.12	41.34	41.26						1.1667		40.72	40.7	41	40.46	40.73	40.61
					1.25		41.5	41	41.2	41.22	41.455	41.39						1.25		40.89	40.8	41	40.64	40.87	40.8
					1.3333		41.8	41.41	41.42	41.41	41.71	41.59						1.3333		41.09	40.7	41.2	40.89	41.08	40.83
																		1.4167		41.39	41	41.5	41.05	41.35	41.13
																		1.5		41.69	41.1	41.58	41.35	41.65	41.32
																		1.5833		41.47	41.6	41.7	41.35	41.57	41.64
Fig 6C
			Nts-GAT+/+		Time (h)		M1	M2	M3	M4	M5	M6				Nts-GAT-/-		Time (h)		M7	M8	M9	M10	M11	M12
			(control)
					-9		36.58	35.9	36.5	36.66	36.6	36.21						-9		35.98	36.9	36	36.26	35.98	36.49
					-8.9167		36.28	36.7	36.5	36.46	36.3	36.34						-8.9167		35.68	36.4	35.84	36.88	35.06	36.16
					-8.8333		36.28	36.9	36.3	36.46	36.1	36.34						-8.8333		36.08	35.944	36.04	36.68	34.97	36.42
					-8.75		36.58	36.9	36	36.26	36.1	36.31						-8.75		35.98	36.044	36.04	36.58	34.9	36.29
					-8.6667		37.08	37.1	35.5	35.96	36	36.31						-8.6667		35.98	36.04	35.34	36.18	35.1	35.88
					-8.5833		36.68	37.1	35.6	35.66	36	36.21						-8.5833		36.08	36.24	36.34	36.18	36.1	36.13
					-8.5		36.78	37.1	35.6	35.56	35.8	36.17						-8.5		36.88	36.04	37.04	36.08	35.9	36.22
					-8.4167		36.58	36.9	35.5	35.76	35.8	36.09						-8.4167		36.88	35.94	36.74	36.28	36	36.28
					-8.3333		36.28	36.9	35.2	36.06	36	36.07						-8.3333		36.68	35.84	36.64	36.18	36.1	36.27
					-8.25		36.18	36.7	35.2	35.96	36	35.97						-8.25		36.58	35.64	36.44	36.08	36.1	36.2
					-8.1667		35.98	36.5	35.1	35.66	36.1	35.82						-8.1667		36.98	35.54	36.34	36.08	35.9	36.21
					-8.0833		35.78	36.5	35.1	35.16	35.9	35.67						-8.0833		37.18	35.54	36.14	35.98	35.7	36.19
					-8		36.18	36.2	35.1	34.96	35.8	35.59						-8		37.58	35.44	35.84	36.18	35.4	36.12
					-7.9167		36.08	35.9	35.2	34.96	35.7	35.47						-7.9167		37.58	35.34	35.84	36.18	35.4	36.13
					-7.8333		35.88	35.9	35.6	35.06	35.5	35.49						-7.8333		37.38	35.24	35.84	36.08	35.3	36.07
					-7.75		35.88	35.7	36.1	35.56	35.3	35.56						-7.75		37.68	35.24	35.84	36.38	35.1	36.11
					-7.6667		35.58	35.6	35.9	35.56	35.2	35.42						-7.6667		37.68	35.34	35.74	36.48	34.9	36.05
					-7.5833		35.38	35.6	35.9	35.26	35	35.31						-7.5833		37.68	35.94	35.74	36.18	34.8	36.08
					-7.5		35.48	35.6	35.6	35.16	35.3	35.31						-7.5		37.48	36.14	35.64	36.28	34.8	36.05
					-7.4167		35.28	35.7	35.5	35.06	35.3	35.27						-7.4167		37.68	36.24	35.64	36.18	34.7	35.94
					-7.3333		35.08	35.7	35.5	34.86	35.3	35.21						-7.3333		37.68	36.24	35.54	36.18	35	35.9
					-7.25		36.28	35.7	35.6	34.76	35.3	35.41						-7.25		37.48	36.14	35.64	36.18	35.5	35.99
					-7.1667		36.08	35.8	35.4	34.76	35.6	35.42						-7.1667		37.48	35.94	35.44	36.38	35.5	35.81
					-7.0833		35.48	35.6	35.8	34.56	35.8	35.32						-7.0833		37.58	35.74	35.44	36.48	35.4	35.66
					-7		35.68	35.5	35.8	34.56	36.3	35.41						-7		37.48	35.64	35.74	36.48	35.3	35.63
					-6.9167		35.58	35.7	35.4	34.86	36.3	35.44						-6.9167		37.38	35.54	35.84	36.78	35.3	35.61
					-6.8333		35.48	35.9	35	35.16	36.2	35.46						-6.8333		37.48	35.54	35.74	36.48	35.3	35.55
					-6.75		35.48	36.2	35.4	35.06	36.2	35.61						-6.75		37.48	35.44	35.54	36.28	35.1	35.51
					-6.6667		35.38	36.2	35.4	35.06	35.9	35.54						-6.6667		37.08	35.44	35.34	36.18	35.1	35.78
					-6.5833		35.38	36	35.3	35.46	35.7	35.49						-6.5833		37.28	35.34	35.44	36.08	35	35.73
					-6.5		35.18	36	35.2	35.46	35.3	35.37						-6.5		37.28	35.24	35.54	36.08	35.1	35.71
					-6.4167		35.68	35.9	35.2	35.86	35.3	35.49						-6.4167		36.98	35.24	35.54	36.18	35	35.8
					-6.3333		35.68	35.7	35.5	35.86	35.3	35.47						-6.3333		36.98	35.14	35.54	36.08	34.9	35.82
					-6.25		35.88	35.7	36.1	35.36	35	35.47						-6.25		36.38	35.14	35.64	36.08	34.9	35.89
					-6.1667		36.08	35.6	36.1	35.36	35	35.47						-6.1667		36.68	35.24	35.64	36.18	35.2	35.93
					-6.0833		36.48	35.4	36.1	35.36	35	35.47						-6.0833		36.08	35.24	35.44	36.08	35.3	35.97
					-6		36.48	35.4	35.9	35.26	35	35.42						-6		36.08	35.14	35.74	36.08	35.1	36.11
					-5.9167		36.18	35.4	35.6	35.26	35.2	35.36						-5.9167		36.08	35.44	36.34	35.98	35.1	36.23
					-5.8333		35.98	36	35.1	35.06	35.8	35.51						-5.8333		36.48	35.44	36.14	35.88	35	36.1
					-5.75		35.88	36	35.1	35.06	36.3	35.57						-5.75		36.68	35.44	36.34	35.88	35	36.04
					-5.6667		35.88	36.1	35	35.06	36.3	35.59						-5.6667		36.78	35.34	36.14	35.78	35	35.94
					-5.5833		35.88	36.1	35.2	34.96	36.2	35.59						-5.5833		36.98	35.24	35.94	36.08	34.9	35.82
					-5.5		35.78	36	35.3	34.96	35.9	35.51						-5.5		36.98	35.14	35.84	36.48	34.9	35.78
					-5.4167		35.38	36	35.3	35.16	35.7	35.44						-5.4167		37.08	35.04	35.74	36.38	34.9	35.69
					-5.3333		35.38	36.3	34.9	35.66	35.5	35.52						-5.3333		36.68	35.04	35.54	36.38	34.8	35.66
					-5.25		35.28	36.4	34.9	35.66	35.6	35.56						-5.25		36.68	35.14	35.74	36.08	34.6	35.6
					-5.1667		35.38	36.6	35	35.56	35.4	35.61						-5.1667		36.98	35.14	35.74	36.08	34.6	35.56
					-5.0833		35.18	36.4	35.3	35.56	35.2	35.52						-5.0833		36.98	35.14	35.64	35.98	34.6	35.51
					-5		35.18	36.2	35.3	35.46	35.3	35.46						-5		36.98	35.04	35.54	35.98	34.7	35.45
					-4.9167		35.68	36	35.8	35.16	35	35.46						-4.9167		36.88	35.14	35.44	35.98	34.7	35.41
					-4.8333		35.98	35.9	35.7	34.96	35.2	35.46						-4.8333		36.88	35.54	35.84	35.98	35.4	35.46
					-4.75		35.88	35.8	35.9	34.86	35.3	35.44						-4.75		37.08	35.94	36.34	35.88	35.3	35.5
					-4.6667		35.88	35.6	35.7	34.86	35.7	35.41						-4.6667		37.08	36.24	36.34	35.88	35.3	35.46
					-4.5833		35.48	35.2	35.6	34.76	36.2	35.26						-4.5833		37.08	36.44	36.34	35.88	35.1	35.6
					-4.5		35.48	35.1	36.2	34.96	36.3	35.37						-4.5		36.78	36.54	36.44	35.98	34.9	35.56
					-4.4167		35.48	35.1	36.4	34.96	36.5	35.44						-4.4167		36.38	36.54	36.64	36.28	35	35.72
					-4.3333		35.38	35.1	36.4	35.26	36.4	35.46						-4.3333		37.08	36.44	36.54	36.58	35	35.76
					-4.25		35.18	35.4	36.5	35.76	36.2	35.59						-4.25		36.88	36.04	36.34	36.68	34.9	35.76
					-4.1667		35.08	35.4	36.2	35.96	36.4	35.59						-4.1667		36.78	35.94	36.14	36.98	34.9	35.79
					-4.0833		35.98	35.5	36.5	35.66	36.8	35.84						-4.0833		37.08	35.74	36.04	37.08	34.7	35.81
					-4		35.88	35.3	36.5	35.66	36.5	35.71						-4		37.38	35.74	35.94	37.08	34.8	35.73
					-3.9167		35.88	35.6	36.4	35.46	36.3	35.72						-3.9167		36.98	35.64	35.74	36.98	35.3	35.71
					-3.8333		35.78	35.5	36.4	35.46	36	35.62						-3.8333		36.88	35.44	36.04	37.18	35.6	35.73
					-3.75		35.78	35.4	36.2	35.26	35.7	35.47						-3.75		36.88	35.24	36.14	37.08	35.6	35.65
					-3.6667		35.78	35.4	36	35.06	35.6	35.39						-3.6667		36.78	35.24	36.54	36.98	35.5	35.66
					-3.5833		35.48	35.2	35.8	34.76	35.8	35.22						-3.5833		36.58	35.14	36.34	36.98	35.8	35.65
					-3.5		36.18	35.1	35.6	34.76	36.2	35.34						-3.5		36.48	35.14	36.14	36.88	36.1	35.79
					-3.4167		36.58	35.4	35.5	34.76	36.1	35.47						-3.4167		37.18	35.14	35.84	36.78	36.1	35.91
					-3.3333		36.58	35.4	35.3	35.66	35.9	35.56						-3.3333		37.18	35.14	35.74	36.78	36.2	36.17
					-3.25		36.68	35.2	35.4	35.96	35.5	35.51						-3.25		37.08	34.94	35.74	36.68	35.9	36.17
					-3.1667		36.68	35.2	35.8	35.76	35.6	35.56						-3.1667		36.88	34.94	35.64	36.68	36.1	36.25
					-3.0833		35.28	35	36.02	35.76	35.6	35.29						-3.0833		36.98	34.84	35.64	36.58	35.8	36.18
					-3		36.01	35.1	36.06	35.76	35.4	35.42						-3		36.98	35.14	35.54	36.48	35.7	36.06
					-2.9167		36.02	36.1	35.7	35.86	36.14	35.84						-2.9167		37.08	35.54	35.44	36.28	35.7	35.97
					-2.8333		36.08	35.72	36.13	36.046	35.94	35.79						-2.8333		37.08	35.64	35.44	36.18	35.5	35.78
					-2.75		35.98	36.2	36.2	36.26	36.2	36.02						-2.75		37.08	36.04	35.34	36.18	35.3	35.75
					-2.6667		35.98	35.8	36.2	36.26	36	35.86						-2.6667		36.88	36.04	35.84	36.38	35.1	35.72
					-2.5833		36.88	36	36.2	35.66	36.1	35.99						-2.5833		36.88	36.04	36.04	36.58	35	35.62
					-2.5		36.38	36	36.1	35.66	36.3	35.92						-2.5		36.88	35.94	36.34	36.68	34.9	35.56
					-2.4167		36.38	35.8	36.1	35.46	36.7	35.89						-2.4167		36.88	35.94	36.64	36.88	34.7	35.58
					-2.3333		36.08	35.8	35.9	35.26	36.8	35.79						-2.3333		36.88	35.74	36.64	36.98	34.6	35.6
					-2.25		36.08	35.5	35.9	34.86	36.6	35.59						-2.25		36.78	35.74	36.64	37.08	34.8	35.7
					-2.1667		35.98	35.5	35.6	35.26	36.3	35.54						-2.1667		36.98	35.74	36.74	37.18	34.7	35.86
					-2.0833		35.68	35.5	35.7	35.76	36.1	35.56						-2.0833		36.98	35.64	36.84	37.18	34.9	36.02
					-2		36.08	35.5	35.5	36.26	35.9	35.64						-2		36.98	35.74	36.74	37.08	34.9	36.25
					-1.9167		35.98	36.1	35.5	36.66	35.8	35.87						-1.9167		37.18	36.14	36.64	36.98	34.8	36.25
					-1.8333		35.98	36.6	36.1	36.46	36.1	36.16						-1.8333		36.98	36.74	36.64	36.98	34.9	36.47
					-1.75		36.08	37	36.2	36.46	36.1	36.32						-1.75		36.98	37.24	36.24	36.88	34.8	36.38
					-1.6667		36.88	37	36.2	36.36	36.2	36.46						-1.6667		37.48	37.44	36.24	36.78	34.9	36.37
					-1.5833		36.88	37	36.3	36.56	36.5	36.56						-1.5833		37.48	37.54	36.14	36.58	34.9	36.28
					-1.5		36.68	37.2	37	36.66	36.6	36.74						-1.5		37.08	37.34	35.94	36.38	34.8	36.13
					-1.4167		36.58	37.5	37	36.36	36.5	36.76						-1.4167		36.98	37.04	36.04	36.38	35.2	36.07
					-1.3333		36.98	37.2	37.2	36.26	36.5	36.74						-1.3333		36.98	36.74	35.94	36.98	35.7	36.1
					-1.25		37.18	37.2	37.2	36.66	36.3	36.81						-1.25		37.18	36.54	35.74	37.28	35.7	36.06
					-1.1667		37.58	36.9	37.1	36.86	36.3	36.79						-1.1667		37.18	36.34	35.74	37.18	35.9	36.02
					-1.0833		37.58	36.5	37.1	36.56	36.4	36.62						-1.0833		37.18	36.24	35.74	37.38	35.9	36.02
					-1		37.38	36.5	37.6	36.76	36.8	36.77						-1		37.38	36.14	35.74	37.58	35.7	35.98
					-0.9167		37.68	37	37.6	37.06	37.1	37.09						-0.9167		37.18	36.04	35.94	37.78	35.9	36
					-0.8333		37.68	37	37.8	36.66	37.7	37.16						-0.8333		37.18	35.84	36.34	37.58	35.7	36.12
					-0.75		37.68	36.8	37.8	36.96	37.5	37.11						-0.75		37.28	36.04	36.34	37.48	35.7	36.3
					-0.6667		37.48	36.3	38.2	37.36	37.8	37.09						-0.6667		37.08	36.54	36.14	37.28	36	36.17
					-0.5833		37.68	36.3	38	37.56	37.9	37.14						-0.5833		36.98	36.74	36.14	37.28	36	36.26
					-0.5		37.68	36.3	38.1	37.06	38.2	37.12						-0.5		37.08	36.94	36.34	37.18	36.1	36.51
					-0.4167		37.48	37.2	38.1	36.76	38.3	37.36						-0.4167		37.08	37.04	36.64	37.38	35.9	36.68
					-0.3333		37.48	36.9	38.1	37.56	38.2	37.37						-0.3333		37.08	37.14	36.94	37.68	36.1	36.78
					-0.25		37.58	36.9	38.1	37.66	38.2	37.41						-0.25		36.68	36.94	36.94	37.58	36.5	36.65
					-0.1667		37.48	37	38	37.66	38.3	37.42						-0.1667		36.68	36.84	36.84	37.68	36.3	36.58
					-0.0833		37.38	37.3	37.9	37.66	38.2	37.47						-0.0833		37.08	36.64	36.84	37.78	36.3	36.71
					0		37.48	37.3	37.7	37.66	38	37.42						0		37.08	36.94	36.84	37.78	36.8	36.8
					0.0833		37.48	37.6	37.9	37.66	37.7	37.51						0.0833		36.98	37.44	36.74	37.88	36.8	36.83
					0.1667		37.08	37.6	37.4	37.76	37.7	37.37						0.1667		36.98	37.84	36.64	37.88	36.8	36.84
					0.25		37.28	37.7	37.5	37.56	37.4	37.37						0.25		36.98	37.84	36.64	37.98	36.6	36.98
					0.3333		37.28	37.7	37.7	37.46	37.2	37.36						0.3333		37.28	37.94	36.64	37.98	36.8	36.91
					0.4167		36.98	37.6	37.3	37.66	37.2	37.24						0.4167		37.18	38.04	36.64	37.88	36.8	36.87
					0.5		36.98	37.6	37.6	37.66	37.1	37.27						0.5		37.18	37.54	36.84	37.88	36.7	36.91
					0.5833		36.38	37.5	37.2	37.36	37.2	37.04						0.5833		37.18	37.84	37.04	37.88	36.7	36.77
					0.6667		36.68	37.5	37.2	37.46	37.2	37.11						0.6667		37.08	37.44	36.84	37.88	36.8	36.84
					0.75		36.08	37.1	37.4	37.46	37.4	36.94						0.75		37.08	37.24	36.74	37.78	36.9	37.17
					0.8333		36.08	37.1	37.6	37.36	37.6	36.99						0.8333		37.08	37.14	36.74	37.68	36.9	37.27
					0.9167		36.08	36.6	37	36.76	37.5	36.61						0.9167		37.18	36.94	36.74	37.58	36.9	37.37
					1		36.48	36.4	37	36.96	37.5	36.64						1		37.48	37.54	36.64	37.38	36.8	37.34
					1.0833		36.68	36.3	37.1	36.46	37.7	36.61						1.0833		37.58	37.74	36.64	37.58	36.9	37.24
					1.1667		36.78	37.2	37.1	36.66	37.9	36.99						1.1667		37.58	37.94	37.14	37.88	37.1	37.42
					1.25		36.98	37.2	37.2	36.56	37.7	36.99						1.25		37.28	38.04	37.24	37.88	37.2	37.39
					1.3333		36.98	37.2	37.2	36.66	38	37.06						1.3333		37.18	38.14	37.24	37.88	37.2	37.31
					1.4167		37.08	37	36.9	36.66	37.7	36.91						1.4167		37.18	38.14	37.24	37.88	37	37.36
					1.5		36.68	37.1	37.2	36.76	37.5	36.91						1.5		37.38	37.94	36.94	37.88	36.9	37.37
					1.5833		36.68	37.2	37.2	37.66	37.3	37.06						1.5833		37.68	37.54	36.94	37.88	36.5	37.46
					1.6667		36.98	37.2	37.3	37.66	37.2	37.11						1.6667		37.68	37.44	36.64	37.88	36.1	37.33
					1.75		36.98	37.2	37.6	37.16	38	37.21						1.75		37.58	37.44	36.94	37.88	36.1	37.47
					1.8333		36.98	37.2	37.4	37.16	38	37.17						1.8333		37.58	37.34	36.84	37.88	36.2	37.5
					1.9167		36.88	37.2	36.8	37.16	38	37.06						1.9167		37.08	37.74	36.84	37.88	36.5	37.44
					2		36.88	37.2	36.8	37.26	37.7	37.02						2		37.08	37.94	37.24	37.78	36.5	37.44
					2.0833		37.08	37.9	37.6	37.06	37.7	37.39						2.0833		37.48	37.94	37.44	37.88	36.5	37.41
					2.1667		37.08	38	37.7	37.16	37.7	37.46						2.1667		37.58	38.04	37.34	37.78	36.4	37.33
					2.25		37.08	37.9	37.5	37.16	37.3	37.32						2.25		37.48	38.04	37.54	37.88	36.4	37.62
					2.3333		36.78	38	37.6	36.86	37.9	37.37						2.3333		37.68	37.34	37.24	37.88	36.3	37.59
					2.4167		36.38	37.7	37.6	37.06	38	37.26						2.4167		37.28	37.44	37.14	37.98	36.2	37.6
					2.5		37.08	37.7	37	37.06	37.7	37.22						2.5		36.88	37.34	36.84	38.18	36.3	37.55
					2.5833		36.88	37.8	38	36.66	37.7	37.32						2.5833		36.98	37.34	36.84	38.48	36.4	37.51
					2.6667		36.78	37.4	37.7	36.66	38	37.17						2.6667		36.88	37.14	37.24	38.18	36.4	37.49
					2.75		37.08	37.5	37.6	36.86	37.7	37.22						2.75		36.78	37.24	37.24	37.88	36.3	37.45
					2.8333		37.38	37.7	37.4	37.06	37.8	37.36						2.8333		36.88	37.24	37.34	37.98	36.1	37.41
					2.9167		36.98	37.5	37.4	37.06	37.8	37.22						2.9167		36.88	37.04	37.44	37.88	36.1	37.29
					3		36.88	37.6	37.6	37.46	37.8	37.34						3		36.68	36.94	37.64	37.78	36.7	37.34
					3.0833		36.88	37.3	37.6	37.46	37.8	37.24						3.0833		36.78	37.04	37.64	37.88	36.9	37.46
					3.1667		36.78	37.3	37.5	37.46	37.7	37.19						3.1667		36.58	37.04	37.54	37.88	37.1	37.36
					3.25		36.58	37.6	37.5	37.46	37.7	37.26						3.25		36.28	36.94	37.54	37.88	37	37.32
					3.3333		36.48	37.9	37.6	37.26	37.4	37.27						3.3333		36.28	36.84	37.54	37.88	37.2	37.28
					3.4167		37.18	37.6	37.6	37.26	37.2	37.26						3.4167		36.28	36.64	37.54	37.88	37	37.12
					3.5		37.18	37.6	37.7	37.06	37.4	37.27						3.5		36.28	37.34	37.74	37.68	37.2	37.2
					3.5833		37.08	37.6	37.6	37.36	37.2	37.26						3.5833		36.38	37.34	37.64	37.48	37.2	37.18
					3.6667		36.88	38.1	37.6	37.36	36.9	37.34						3.6667		36.38	37.54	37.74	37.78	36.8	37.23
					3.75		36.98	38.1	37.8	37.26	36.95	37.38						3.75		36.48	37.64	37.74	38.18	36.7	37.14
					3.8333		36.98	38.1	37.3	36.86	36.9	37.22						3.8333		36.68	37.54	37.64	38.28	36.5	37.3
					3.9167		37.08	38	37.6	36.86	37	37.27						3.9167		36.68	37.54	37.54	38.38	36.5	37.29
					4		37.08	38	37.7	37.16	37.6	37.44						4		36.68	37.34	37.34	38.38	36.5	37.27
					4.0833		37.08	37.9	37.7	37.16	37.6	37.41						4.0833		36.58	37.14	37.34	38.38	36.3	37.21
					4.1667		36.88	38	37.4	37.16	37.6	37.36						4.1667		36.68	37.04	37.14	38.38	36.6	37.22
					4.25		36.88	38.1	37.3	37.06	37.5	37.34						4.25		36.58	37.04	36.94	38.28	36.5	37.36
					4.3333		36.88	37.9	37.5	37.06	37.9	37.37						4.3333		36.58	37.24	36.84	38.28	36.5	37.39
					4.4167		36.88	37.9	37.4	37.06	37.7	37.32						4.4167		36.38	37.54	36.84	38.38	36.5	37.42
					4.5		36.88	37.7	37.3	37.06	37.7	37.24						4.5		36.38	37.54	36.84	38.28	36.5	37.46
					4.5833		36.78	37.8	37.1	37.06	37.4	37.17						4.5833		36.38	37.54	36.94	38.38	36.4	37.38
					4.6667		36.98	37.8	37.2	37.16	37.3	37.22						4.6667		36.38	37.44	36.94	38.28	36.3	37.45
					4.75		36.98	37.9	37.2	37.06	37.3	37.24						4.75		36.78	37.24	36.74	38.58	36.3	37.39
					4.8333		36.98	37.4	37.2	36.76	37.1	36.99						4.8333		36.78	37.24	36.74	38.58	35.8	37.48
					4.9167		37.18	37.7	37.4	36.66	37.5	37.21						4.9167		36.78	37.04	36.64	38.68	36	37.72
					5		36.98	37.6	37.2	36.56	38	37.17						5		36.78	37.04	37.04	38.78	36.2	37.64
					5.0833		36.98	37.6	37.3	36.66	38.1	37.22						5.0833		37.08	37.34	37.04	38.78	36.2	37.78
					5.1667		37.48	37.5	37.3	36.36	37.8	37.17						5.1667		37.08	37.44	36.84	38.78	36.3	37.79
					5.25		37.48	37.1	37.1	36.36	37.8	37.01						5.25		36.98	37.14	37.14	38.78	36.3	37.72
					5.3333		37.08	37.3	37.1	36.76	37.9	37.09						5.3333		36.68	37.24	37.54	38.68	36.1	37.63
					5.4167		36.98	37.1	37.1	36.66	37.7	36.96						5.4167		36.68	37.14	37.64	38.18	36.3	37.58
					5.5		36.98	37.1	37	36.56	37.7	36.92						5.5		36.68	37.04	37.94	37.88	36.5	37.64
					5.5833		37.18	37.5	37.3	37.36	37.7	37.27						5.5833		36.98	36.84	38.14	37.88	36.8	37.68
					5.6667		37.18	37.5	37.3	37.16	37.6	37.22						5.6667		36.98	36.64	38.04	37.88	37	37.78
					5.75		37.18	38	37.4	37.16	37.3	37.36						5.75		36.88	37.04	37.84	37.68	36.9	37.91
					5.8333		37.38	37.8	37.2	36.96	37.2	37.24						5.8333		36.98	37.04	37.44	37.98	36.9	38.05
					5.9167		37.18	37.8	37.2	36.86	37.5	37.24						5.9167		36.98	37.14	37.44	37.98	36.9	37.99
					6		37.18	38.1	37.5	36.66	37.3	37.32						6		36.68	37.24	37.14	37.88	36.7	37.85
					6.0833		37.28	38.1	37.5	36.46	37.5	37.34						6.0833		37.08	37.74	37.04	37.88	36.7	37.8
					6.1667		37.08	38.1	37.6	36.46	37.9	37.39						6.1667		36.98	37.94	37.04	37.78	36.4	37.76
					6.25		36.98	38.1	37.2	36.86	38	37.39						6.25		36.98	37.94	36.84	37.48	36.1	37.44
					6.3333		37.08	38.1	37.4	36.66	37.9	37.39						6.3333		36.88	37.94	36.64	37.48	36	37.43
					6.4167		37.08	38.1	37.4	36.76	37.7	37.37						6.4167		36.88	37.94	36.74	37.28	36.3	37.2
					6.5		37.08	38	37.2	37.06	37.7	37.36						6.5		36.68	37.84	37.24	37.28	36.4	37.23
					6.5833		36.68	38	37.3	37.16	37.7	37.32						6.5833		36.68	37.84	37.34	37.18	36.3	37.31
					6.6667		36.68	37.9	37.3	37.16	37.5	37.26						6.6667		36.58	37.64	37.34	37.08	36.2	37.19
					6.75		37.08	38	37.1	37.06	37.3	37.27						6.75		36.58	37.64	37.04	36.88	36	37.12
					6.8333		37.08	38	37.5	36.86	37.6	37.36						6.8333		36.58	37.94	37.04	36.88	35.8	37.08
					6.9167		36.98	37.8	37.5	36.86	37.4	37.24						6.9167		36.58	37.54	37.04	36.78	35.6	37.01
					7		36.98	37.9	37.6	37.06	37.6	37.36						7		36.48	37.54	36.74	36.58	36.1	37.01
					7.0833		36.98	37.8	37.3	37.66	37.8	37.41						7.0833		36.38	37.44	36.74	36.98	36.1	37.02
					7.1667		37.28	37.7	37.5	37.46	37.7	37.41						7.1667		36.48	37.84	37.24	36.98	36.6	37.12
					7.25		37.18	37.9	37.1	37.26	37.7	37.36						7.25		36.68	37.54	36.74	36.98	36.5	37.07
					7.3333		37.18	37.9	37.3	37.56	37.9	37.47						7.3333		36.38	37.44	36.94	37.28	36.2	37.1
					7.4167		37.18	37.7	37.3	37.36	37.8	37.36						7.4167		36.18	37.34	36.84	37.28	35.9	37.08
					7.5		37.08	37.6	37.5	37.06	37.5	37.24						7.5		35.98	37.44	36.84	37.08	36.3	37.16
					7.5833		37.08	37.5	37.4	37.06	37.4	37.17						7.5833		35.98	37.54	36.64	37.08	36.1	37.09
					7.6667		37.08	37.7	37.2	36.96	38	37.29						7.6667		35.98	37.14	37.04	36.88	36.2	37.05
					7.75		37.18	37.7	37.9	36.96	38	37.42						7.75		36.08	37.24	37.34	36.88	36.3	37.12
					7.8333		37.48	37.6	37.9	36.86	37.9	37.41						7.8333		35.98	37.44	37.34	36.58	36.4	37.06
					7.9167		37.58	37.3	38	36.96	37.9	37.36						7.9167		35.98	37.84	37.54	36.68	36.4	37.02
					8		37.58	37.3	37.6	36.96	37.7	37.26						8		36.08	37.94	37.64	36.48	36.4	36.97
					8.0833		37.28	37.1	37.4	36.96	37.3	37.04						8.0833		36.28	38.14	37.74	36.48	36.3	37.07
					8.1667		37.18	37.3	37	36.76	37.7	37.06						8.1667		36.28	38.24	37.84	36.58	35.9	36.98
					8.25		37.18	37.2	37	36.76	37.5	36.99						8.25		36.48	38.34	37.94	36.48	36.4	37.04
					8.3333		37.38	37.4	37.5	37.06	37.3	37.19						8.3333		36.48	38.04	37.74	36.48	36.5	37.19
					8.4167		37.68	37.4	37.5	36.96	37.2	37.21						8.4167		36.08	38.04	37.74	36.48	36.6	37.12
					8.5		37.68	37.4	37.6	36.76	37.2	37.19						8.5		36.18	37.74	37.74	36.98	36.3	37.18
					8.5833		37.58	37.5	37.5	36.46	37.1	37.12						8.5833		36.78	37.74	37.64	37.28	36.3	37.21
					8.6667		37.58	37.4	37.5	36.86	37.3	37.19						8.6667		36.78	37.64	37.54	37.58	36.4	37.18
					8.75		37.08	37.4	37.2	36.76	37.4	37.06						8.75		36.98	37.54	37.44	37.58	36.3	37.17
					8.8333		37.08	37.2	37.6	36.76	37.2	37.02						8.8333		36.58	37.54	37.24	37.78	36.2	37.16
					8.9167		37.48	37.4	37.5	36.76	37.2	37.14						8.9167		36.28	37.64	36.74	37.58	36.2	36.91
					9		37.58	37	37.5	37.26	37.3	37.12						9		36.28	37.54	36.64	37.78	36.4	36.92
					9.0833		37.48	37	37.4	37.26	37.4	37.11						9.0833		36.28	37.44	36.74	37.68	36.8	36.88
					9.1667		37.68	37	37.5	37.06	37.3	37.11						9.1667		36.08	37.64	36.64	37.48	36.8	36.87
					9.25		37.28	37	37.3	36.96	37.4	37.01						9.25		35.78	37.74	36.64	37.38	36.8	36.99
					9.3333		36.88	36.9	37.5	36.96	37.3	36.92						9.3333		35.28	37.64	36.54	37.38	36.8	37.16
					9.4167		36.98	36.7	37.2	36.96	37.1	36.79						9.4167		35.38	37.64	36.34	37.58	36	37.18
					9.5		36.88	36.9	36.9	37.06	37.1	36.81						9.5		35.38	37.64	36.34	37.38	36	37.23
					9.5833		36.78	37.2	36.9	37.16	36.7	36.84						9.5833		35.28	37.64	36.64	37.38	35.9	37.28
					9.6667		36.88	37.2	36.7	36.86	36.7	36.77						9.6667		34.98	37.84	36.54	37.38	35.9	37.29
					9.75		36.88	37.5	37.1	36.56	36.74	36.9						9.75		34.98	37.94	36.84	37.08	35.9	37.26
					9.8333		36.68	37.5	37.1	36.36	36.87	36.85						9.8333		34.88	37.84	37.14	37.28	35.8	37.21
					9.9167		36.78	37.4	37.6	36.56	37.03	36.98						9.9167		34.88	37.44	37.04	37.38	36	37.11
					10		36.58	37.4	37.2	36.56	36.7	36.82						10		34.88	37.44	36.84	37.48	36.4	37.12
					10.0833		36.28	37.6	37.2	36.66	36.6	36.84						10.0833		34.98	37.34	36.84	37.58	36.8	36.97
					10.1667		36.28	37.6	37	36.76	36.95	36.88						10.1667		35.38	37.34	36.64	37.48	36.8	36.83
					10.25		36.28	37.9	36.9	36.76	36.6	36.91						10.25		35.88	37.74	36.64	37.18	36.8	36.83
					10.3333		36.28	37.5	36.8	36.76	36.6	36.76						10.3333		35.68	37.74	36.64	37.08	36.9	36.76
					10.4167		36.38	37.3	36.7	36.76	36.7	36.71						10.4167		35.68	37.94	36.54	36.98	36.4	36.81
					10.5		36.38	36.9	37.1	36.76	36.7	36.64						10.5		35.38	38.04	36.04	36.88	36.4	36.73
					10.5833		36.48	37.3	37.1	36.96	36.9	36.86						10.5833		35.28	38.04	35.84	36.78	36.2	36.71
					10.6667		36.68	37.3	36.9	36.76	36.8	36.81						10.6667		35.28	38.14	35.84	37.18	36.2	36.7
					10.75		36.68	37.3	36.9	36.56	36.9	36.79						10.75		35.38	38.24	35.74	37.18	36.1	36.64
					10.8333		36.68	37.6	36.9	36.36	36.7	36.82						10.8333		35.18	37.54	35.74	37.28	36	36.51
					10.9167		36.58	37.6	37	36.16	36.82	36.81						10.9167		35.58	37.54	36.04	37.58	35.9	36.63
					11		36.68	37.8	37	36.36	36.92	36.94						11		35.58	37.34	36.54	37.58	35.8	36.78
					11.0833		36.58	37.8	36.8	36.36	36.9	36.89						11.0833		35.18	37.34	37.04	37.78	35.9	36.94
					11.1667		36.58	37.8	36.4	36.46	36.9	36.84						11.1667		34.78	37.04	37.04	37.78	35.9	36.96
					11.25		36.38	37.6	37.2	36.46	37.3	36.94						11.25		35.18	37.04	37.44	37.88	36.2	36.96
					11.3333		36.38	37.6	37.2	36.36	37.3	36.92						11.3333		35.18	37.44	37.44	37.78	36.2	36.91
					11.4167		36.38	37.3	36.9	36.16	37.4	36.76						11.4167		35.08	37.14	37.34	37.68	36.2	36.84
					11.5		36.38	37.5	36.9	36.16	37.3	36.81						11.5		34.98	37.34	37.34	37.68	36.1	36.8
					11.5833		36.78	37.5	37.3	36.56	37.3	37.01						11.5833		34.98	37.24	37.34	37.48	36.2	36.78
					11.6667		36.78	37.4	37.3	36.36	37.5	36.97						11.6667		35.28	37.14	37.24	37.18	36	36.78
					11.75		36.78	37.7	37.3	36.36	37.3	37.04						11.75		35.88	36.84	37.14	37.18	35.8	36.7
					11.8333		36.78	37.9	37.2	36.76	37.2	37.14						11.8333		35.88	36.84	37.04	37.08	35.8	36.65
					11.9167		37.08	38	37.4	36.76	37.2	37.26						11.9167		35.88	36.94	36.84	36.98	35.7	36.48
					12		37.08	38	37.6	36.96	37.1	37.31						12		35.68	36.94	36.74	36.78	35.6	36.46
					12.0833		36.98	37.9	37.6	37.16	36.9	37.26						12.0833		35.38	37.04	36.34	36.48	35.5	36.36
					12.1667		36.68	37.4	37.5	37.16	36.7	36.99						12.1667		34.88	37.04	36.34	36.48	35.7	36.69
					12.25		36.68	37.1	37.5	36.76	37.1	36.89						12.25		34.88	36.54	36.34	36.48	35.5	36.65
					12.3333		36.68	37.1	37.4	36.66	37.1	36.86						12.3333		34.78	36.84	36.64	36.58	36	36.89
					12.4167		36.98	37.1	37.4	36.66	36.9	36.87						12.4167		34.98	36.94	36.64	36.38	36	36.89
					12.5		36.98	37.9	37.3	36.36	37.2	37.12						12.5		35.08	36.84	36.84	36.48	35.9	36.97
					12.5833		36.88	37.9	37.1	35.96	37.2	37.01						12.5833		35.08	36.74	36.94	36.18	35.9	36.91
					12.6667		36.98	38.1	36.9	35.96	37.1	37.04						12.6667		34.68	36.74	37.04	36.18	35.8	36.83
					12.75		36.98	37.8	36.9	35.76	37.2	36.92						12.75		34.68	36.44	36.94	36.18	35.7	36.73
					12.8333		36.68	37.9	36.8	35.96	37.3	36.94						12.8333		34.78	36.24	36.94	36.18	35.5	36.49
					12.9167		37.08	37.9	36.4	35.96	37.3	36.94						12.9167		35.08	36.14	36.84	35.98	35.2	36.42
					13		36.98	37.9	36.4	35.96	37.5	36.96						13		35.08	35.94	37.04	35.68	35.2	36.33
					13.0833		36.98	37.9	36.9	35.86	37.4	37.01						13.0833		35.58	35.94	36.84	35.88	35.3	36.31
					13.1667		36.88	37.7	37.3	35.66	37.3	36.94						13.1667		35.48	35.74	36.54	35.78	35.3	36.37
					13.25		36.88	37.9	37.3	35.66	37.4	37.02						13.25		35.68	35.74	36.54	35.78	35.2	36.29
					13.3333		36.68	37.7	37	36.16	37.2	36.92						13.3333		35.48	35.64	36.44	35.88	35	36.21
					13.4167		36.68	37.7	36.9	36.16	37.2	36.91						13.4167		35.38	35.74	36.24	35.88	35	36.03
					13.5		36.58	37.5	37.2	36.46	37.1	36.91						13.5		35.98	35.64	36.14	35.68	34.9	35.92
					13.5833		36.58	37.4	37	36.46	37.2	36.86						13.5833		36.18	35.64	36.04	35.58	35.1	36.14
					13.6667		36.58	37.7	37	36.66	37.3	37.01						13.6667		36.18	35.54	35.84	35.48	35.1	36.27
					13.75		36.58	37.7	36.8	36.46	37.3	36.94						13.75		36.28	35.44	35.74	35.48	35.5	36.37
					13.8333		36.48	37.7	36.5	36.36	37.3	36.86						13.8333		35.98	35.24	35.54	35.48	35.5	36.3
					13.9167		36.38	37.6	36.5	36.36	37.3	36.81						13.9167		36.28	35.24	35.44	35.48	35.8	36.21
					14		36.48	37.5	36.5	36.16	37.1	36.72						14		36.28	35.24	35.34	35.48	35.9	36.32
					14.0833		36.68	37.5	36.4	36.66	37.1	36.82						14.0833		36.18	35.14	35.54	36.38	36	36.3
					14.1667		36.38	37.4	36.4	36.66	37.2	36.76						14.1667		35.32	34.94	35.54	36.38	36.2	36.18
					14.25		36.18	37.2	37.1	36.86	37.6	36.87						14.25		35.32	34.84	36.04	36.68	36.5	36.24
					14.3333		35.98	37.2	37.1	36.76	37.7	36.84						14.3333		35.22	34.94	36.04	37.18	36.4	36.23
					14.4167		35.98	37.2	37.1	36.36	37.7	36.77						14.4167		35.12	34.94	35.94	37.48	36.3	36.16
					14.5		35.98	37.2	37	36.36	37.4	36.71						14.5		35.02	34.84	36.04	37.48	36.3	36.07
					14.5833		36.08	36.7	37	36.76	37.6	36.66						14.5833		35.02	35.14	35.84	37.48	35.9	36.11
					14.6667		35.98	37.2	36.6	36.36	37.3	36.62						14.6667		35.12	35.34	35.84	37.48	35.4	36.05
					14.75		35.98	37.2	36.6	36.66	37.3	36.67						14.75		35.72	36.04	35.74	37.58	35.3	36.03
					14.8333		36.08	37.1	36.9	36.46	37.2	36.66						14.8333		35.92	36.04	35.64	37.48	35	36.16
					14.9167		36.28	37	36.6	36.06	37.1	36.52						14.9167		36.02	35.84	35.54	37.28	34.9	36.06
					15		36.28	37	36.6	36.06	37.2	36.54						15		36.02	35.84	35.64	36.98	34.9	36
					15.0833		36.48	36.8	36.6	36.36	37.4	36.59						15.0833		35.92	35.64	35.94	36.88	34.7	35.95
					15.1667		36.48	36.8	36.3	36.46	37.2	36.52						15.1667		35.72	35.44	36.14	36.78	34.7	35.93
					15.25		36.08	36.7	36.3	36.26	37	36.36						15.25		35.52	35.44	35.94	36.88	34.6	35.87
					15.3333		36.18	36.9	36.5	36.06	37.1	36.46						15.3333		35.42	35.44	35.94	36.68	34.6	35.82
					15.4167		36.78	37	36.4	35.86	37.1	36.54						15.4167		35.32	35.14	35.74	36.58	34.6	35.51
					15.5		36.78	37.5	36.3	35.56	37.1	36.64						15.5		35.32	35.14	35.64	36.48	34.6	35.47
					15.5833		36.98	37.3	36.1	35.56	37.8	36.69						15.5833		35.22	35.14	35.54	36.48	34.7	35.52
					15.6667		36.58	37.3	36.1	35.96	37.6	36.66						15.6667		35.22	35.14	35.64	36.38	34.7	35.81
					15.75		36.28	37.5	37	36.16	37	36.76						15.75		35.12	34.94	35.74	36.18	34.7	35.75
					15.8333		36.28	37.2	37.2	36.06	36.9	36.66						15.8333		35.02	35.04	35.64	36.18	34.7	35.95
					15.9167		36.28	37.1	37.2	36.26	36.6	36.61						15.9167		35.02	35.14	35.54	36.18	34.9	36.1
					16		36.08	36.8	37	35.76	36.4	36.32						16		34.92	35.34	35.44	36.18	35	36.07
					16.0833		35.78	36.8	37	35.66	36.2	36.22						16.0833		34.92	35.34	35.34	36.28	35.3	36.22
					16.1667		35.28	37.2	36.8	35.66	36	36.21						16.1667		35.02	35.24	35.34	36.38	35.4	36.25
					16.25		35.38	37.2	36.5	35.86	35.9	36.19						16.25		35.02	35.14	35.34	36.58	35.5	36.19
					16.3333		35.38	37.2	36.2	35.76	36	36.14						16.3333		34.92	35.04	35.44	36.58	35.7	36.41
					16.4167		35.28	37.1	36.1	35.56	36	36.04						16.4167		35.22	34.94	35.34	36.48	35.7	36.45
					16.5		34.98	37.1	36.3	35.56	35.9	36.01						16.5		35.22	34.84	35.34	36.48	35.7	36.41
					16.5833		34.98	37.1	36.6	35.56	36	36.07						16.5833		35.22	34.94	35.44	36.58	35.5	36.42
					16.6667		34.88	37	36.5	35.26	36	35.96						16.6667		35.12	34.84	35.44	36.48	35.5	36.56
					16.75		34.88	37	36.2	35.06	36	35.87						16.75		35.02	34.74	36.14	36.28	35.7	36.56
					16.8333		34.88	37	35.7	35.06	36	35.79						16.8333		34.92	34.84	36.04	36.18	35.5	36.47
					16.9167		34.98	36.4	35.5	35.66	36.1	35.69						16.9167		34.82	34.84	35.94	36.18	35.2	36.23
					17		35.38	36.4	35.5	35.76	36	35.76						17		34.82	35.34	35.94	35.98	35.1	36.1
					17.0833		35.88	36.5	35.6	35.76	36.2	35.92						17.0833		34.92	36.24	36.04	35.88	34.9	36.07
					17.1667		35.68	36.5	36.1	35.96	35.9	35.96						17.1667		34.92	36.74	36.44	35.88	34.9	36.01
					17.25		35.68	36.2	36.1	35.96	35.9	35.86						17.25		35.44	35.52	36.44	35.78	34.9	35.9
					17.3333		35.38	36.1	35.8	35.56	35.8	35.64						17.3333		35.14	35.42	36.54	35.58	36	35.93
					17.4167		35.28	36	35.7	35.56	35.9	35.59						17.4167		35.14	35.32	35.34	35.48	36	35.86
					17.5		35.28	36.2	35.6	35.56	35.9	35.64						17.5		35.14	35.32	35.34	35.48	35.9	35.78
					17.5833		35.38	36.2	35.4	35.36	36.1	35.62						17.5833		35.14	35.22	35.34	35.38	36.2	35.79
					17.6667		35.18	36.2	35.3	35.16	36.3	35.57						17.6667		34.94	35.22	35.24	35.38	36.3	35.71
					17.75		35.58	35.8	35.3	35.66	36.5	35.62						17.75		35.04	35.12	35.34	35.38	35.9	35.77
					17.8333		35.58	35.7	35.1	35.36	36.4	35.49						17.8333		35.14	35.02	35.34	35.28	35.9	35.92
					17.9167		35.18	35.6	35.1	35.16	36.3	35.34						17.9167		35.34	35.02	35.34	35.18	35.7	36.07
					18		34.78	35.6	35.4	35.16	36	35.27						18		35.34	35.12	35.24	35.18	35.6	36.14
					18.0833		35.18	35.4	35.7	35.06	36	35.31						18.0833		34.84	35.02	36.04	35.18	35.5	36.3
					18.1667		35.18	35.4	35.6	34.96	35.8	35.24						18.1667		35.14	35.02	35.44	34.88	35.3	36.21
					18.25		35.08	35.2	35.6	34.96	35.7	35.14						18.25		35.34	35.12	35.74	34.88	35.3	36.38
					18.3333		34.98	35.6	36	34.66	36	35.32						18.3333		36.04	35.72	36.04	35.38	35.1	36.38
					18.4167		34.98	35.6	36	34.46	36.1	35.31						18.4167		36.04	35.92	36.44	35.48	34.9	36.37
					18.5		35.28	35.6	36.4	34.46	36.2	35.44						18.5		35.84	36.02	36.24	35.78	34.8	36.5
					18.5833		35.88	35.6	36.4	34.46	36.1	35.52						18.5833		35.84	36.02	35.94	35.78	34.6	36.43
					18.6667		35.88	35.4	35.9	34.36	35.7	35.29						18.6667		35.64	35.92	36.14	35.68	34.6	36.44
					18.75		35.88	35.5	35.9	34.86	35.7	35.41						18.75		35.44	35.72	36.14	35.68	34.6	36.34
					18.8333		35.68	35.5	35.9	34.86	36.3	35.47						18.8333		35.12	35.52	36.14	35.78	34.6	36.2
					18.9167		35.38	35.5	35.8	35.06	36.2	35.42						18.9167		35.02	35.42	35.94	35.78	34.5	36.03
					19		34.88	35.5	35.8	34.86	36.1	35.29						19		35.02	35.44	35.94	35.78	34.5	35.95
					19.0833		34.88	35.3	35.6	34.86	35.8	35.14						19.0833		35.12	35.24	35.74	35.88	34.5	35.8
					19.1667		34.78	35.3	35.6	34.86	35.7	35.11						19.1667		35.72	35.24	35.64	35.88	34.5	35.79
					19.25		34.98	35.2	35.6	34.86	36.3	35.21						19.25		35.92	35.24	35.54	36.08	34.5	35.73
					19.3333		35.08	35	35.5	34.76	35.3	34.96						19.3333		36.02	35.14	35.64	36.68	34.4	35.7
					19.4167		35.08	35.1	35.5	34.56	35.4	34.97						19.4167		36.02	34.94	35.44	36.88	34.9	35.81
					19.5		34.68	35.1	35.7	34.56	35.4	34.94						19.5		35.92	34.84	35.14	37.18	35	35.81
					19.5833		34.68	35.2	36.2	34.36	36.24	35.16						19.5833		35.72	34.94	35.14	37.18	35.2	35.85
					19.6667		34.78	35.2	36.2	35.46	36.4	35.39						19.6667		35.52	35.94	35.14	37.28	35.3	35.87
					19.75		35.08	35.4	36.1	35.46	36.3	35.47						19.75		35.42	36.04	35.14	37.08	35.3	35.78
					19.8333		35.08	35.4	36.1	35.46	36.3	35.47						19.8333		35.44	36.44	34.94	36.88	35.3	35.79
					19.9167		35.58	35.2	36	35.76	36.3	35.52						19.9167		35.24	36.44	35.04	36.78	35.3	35.67
					20		35.48	35.3	35.7	35.66	36.2	35.46						20		35.24	36.54	35.14	36.58	35.3	35.53
					20.0833		35.68	35.2	35.5	35.66	36.1	35.41						20.0833		35.24	35.34	35.34	36.58	35.3	35.46
					20.1667		35.48	35.2	35.4	35.66	36.3	35.39						20.1667		35.14	35.34	35.34	36.48	35.3	35.46
					20.25		35.38	35.2	35.4	35.36	36.1	35.29						20.25		34.94	35.34	34.84	36.28	35.3	35.67
					20.3333		35.98	35	35.3	35.06	35.8	35.21						20.3333		34.84	35.24	35.14	36.08	35.3	35.65
					20.4167		36.18	35	35.5	34.96	35.7	35.24						20.4167		34.94	35.34	35.34	36.08	35.3	35.64
					20.5		36.18	35.6	35.5	34.76	35.53	35.38						20.5		35.54	35.34	36.04	35.98	35.3	36.04
					20.5833		36.28	35.6	35.8	34.66	35.6	35.44						20.5833		35.64	35.34	36.04	35.88	35.3	36.15
					20.6667		35.98	35.5	36.3	34.56	35.6	35.42						20.6667		35.74	35.24	35.84	36.08	35.3	36.2
					20.75		36.28	35.6	36.5	34.66	35.9	35.61						20.75		35.64	36.04	35.84	36.18	35.3	36.21
					20.8333		36.28	35.4	36.2	34.66	36.4	35.57						20.8333		35.54	36.44	35.14	36.18	35.3	35.71
					20.9167		36.18	35.4	36.2	34.96	35.8	35.51						20.9167		35.44	36.44	35.34	36.18	35.3	35.64
					21		34.86	36	36	34.96	35.7	36						21		35.54	35.14	35.4	35.84	35.3	36.15
Fig 6D
			Nts-GAT+/+		Time (h)		M1	M2	M3	M4	M5	M6				Nts-GAT-/-		Time (h)		M7	M8	M9	M10	M11	M12
			(control)
					-1.92		35.2	36.4	35.13	35.1	35.4	35.96						-1.92		36.2	35.8	35.7	35.8	36.35	35.94
					-1.84		35.3	36.4	35.56	35.7	35.3	36.16						-1.84		36	35.7	35.8	35.9	36.2	35.89
					-1.75		35.2	36	35.79	36.1	35.3	36.03						-1.75		36.2	35.6	35.7	36.1	36.4	35.97
					-1.67		35.3	36	35.83	36.1	35.3	36.03						-1.67		36.3	35.4	35.6	36.1	36.14	35.88
					-1.59		35.2	35.8	35.79	36.1	35.2	35.89						-1.59		36.7	35.4	35.4	36.1	36.4	35.97
					-1.5		35.2	35.8	35.66	35.9	35.2	35.83						-1.5		36.5	35.3	35.4	36.5	36.25	35.96
					-1.42		35.1	35.8	35.49	35.7	35.3	35.76						-1.42		36.4	35.3	35.6	36.4	36.35	35.98
					-1.34		35	35.7	35.26	35.4	35.5	35.59						-1.34		36.5	35.2	35.6	36.2	36.4	35.95
					-1.25		35.2	35.7	35.13	35.1	35.3	35.49						-1.25		36.6	35.2	35.7	36.2	36.02	35.91
					-1.17		35	35.6	35.13	35.2	35.2	35.46						-1.17		36.3	35.5	35.5	36.3	36.3	35.95
					-1.09		35.3	35.4	35.23	35.2	36	35.33						-1.09		36.1	36	35.5	36.2	36.03	35.93
					-1		35	35.7	35.06	35.1	36	35.49						-1		36.1	36	35.5	36.2	36.4	36.01
					-0.92		34.9	36.1	35.36	35.6	36	35.93						-0.92		36	36	35.8	36.1	36.1	35.97
					-0.84		34.8	36.04	35.39	35.7	35.8	35.92						-0.84		36.1	35.9	35.7	36.1	36.3	35.99
					-0.75		35.2	35.74	35.39	35.5	35.6	35.65						-0.75		36	35.7	35.7	36.1	36.3	36.01
					-0.67		35.7	36.36	35.43	35.3	35.4	36						-0.67		36	35.7	35.8	36.2	36.1	35.97
					-0.59		35.8	36.5	35.33	35.1	35.4	36.03						-0.59		35.8	35.7	35.7	36	36	35.87
					-0.5		35.7	35.2	35.36	35.2	35.4	35.19						-0.5		35.7	35.4	35.6	36	35.9	35.73
					-0.42		35.7	35.3	35.29	35.1	35.3	35.23						-0.42		35.7	35.4	35.6	35.9	35.7	35.69
					-0.34		35.6	35.42	35.26	35.1	35.3	35.31						-0.34		35.6	35.3	35.4	35.8	35.8	35.57
					-0.25		35.4	35.62	35.13	35	35.8	35.41						-0.25		35.4	35.3	35.4	35.9	36	35.51
					-0.17		35.9	35.2	35.23	34.9	36.1	35.09						-0.17		35.3	35.3	35.4	35.8	36.2	35.49
					-0.09		35.8	35.73	35.26	35	36	35.48						-0.09		35.3	35.4	36.1	35.9	36.3	35.71
					0		35.7	35.942	35.23	35	36.1	35.62						0		36.6	35.3	37	36.9	36.9	36.37
					0.08		36.6	36.9	35.53	35	36.4	36.26						0.08		37.4	36.4	37.1	37.4	37.4	36.89
					0.16		36	36.8	35.66	35.5	36.3	36.36						0.16		37.6	37	37.3	37.2	38	37.17
					0.25		36.2	36.4	35.93	35.8	36.4	36.19						0.25		37.6	37	37.2	37.1	38.1	37.23
					0.33		36.6	35.9	36.39	36.3	36.2	36.03						0.33		37.3	37	37	36.7	37.9	37.19
					0.41		36.2	35.7	35.99	35.9	36	35.76						0.41		37.1	37.1	36.7	36.6	37.8	37.09
					0.5		36.7	35.7	35.96	35.6	35.9	35.66						0.5		36.7	36.9	36.7	36.6	37.7	36.93
					0.58		36.1	35.3	35.83	35.7	35.9	35.43						0.58		36.7	36.8	36.8	36.5	37.6	36.89
					0.66		35.8	35	35.99	36.1	35.9	35.36						0.66		36.6	36.6	37.1	36.4	37.2	36.85
					0.75		35.3	35.1	35.69	35.9	35.8	35.36						0.75		36.4	36.6	37	36.2	36.8	36.73
					0.83		35.2	34.6	35.79	36.1	35.6	35.09						0.83		36.6	36.5	36.6	36.1	36.9	36.57
					0.91		35	34.3	35.53	35.8	35.5	34.79						0.91		36.4	36.6	36.6	36.2	36.6	36.49
					1		34.7	33.9	35.83	36.4	35.3	34.73						1		36.5	36.5	36.6	36.2	36.7	36.51
					1.08		34.6	33.6	35.46	35.9	35.2	34.36						1.08		36.4	36.5	36.6	36.1	36.7	36.41
					1.16		34.42	33.4	35.53	36.1	35	34.29						1.16		36.3	36.3	36.4	36	36.29	36.31
					1.25		34.2	33.2	34.73	35	34.8	33.79						1.25		36.5	36	35.9	36.1	36.7	36.21
					1.33		33.8	33.2	34.46	34.8	34.8	33.73						1.33		36.1	36	35.8	36.1	36.2	36.03
					1.41		33.5	33.1	34.09	34.4	34.5	33.53						1.41		36	35.9	36.1	36	36	36.11
					1.5		33.4	33	33.86	34.1	34.1	33.36						1.5		36	35.9	36.2	35.9	35.9	36.01
					1.58		33.6	33	33.79	33.9	34.2	33.29						1.58		35.8	35.9	36.1	35.8	35.8	35.89
					1.66		33.7	33.1	33.69	33.7	34.1	33.29						1.66		35.7	35.9	36	35.7	35.7	35.81
					1.75		33.5	33.3	33.89	34.1	34.1	33.56						1.75		35.9	36	36	35.5	35.6	35.81
					1.83		33.3	33.5	33.89	34.2	34.4	33.73						1.83		35.7	35.8	35.8	35.4	35.5	35.67
					1.91		33.2	34	33.99	34.4	34.1	34.13						1.91		35.7	35.9	35.8	35.3	35.4	35.65
					2		33.4	33.3	34.06	34.4	33.9	33.66						2		35.9	35.9	35.8	35.2	35.3	35.65
					2.08		33.5	33.6	34.03	34.3	33.9	33.83						2.08		35.9	35.8	35.9	35.3	35.2	35.65
					2.16		33.5	33.5	33.89	34.1	33.9	33.69						2.16		35.8	35.6	36.1	35.2	35.3	35.59
					2.25		33.7	33.3	33.76	33.8	33.6	33.46						2.25		35.6	35.5	36	35.1	35.2	35.47
					2.33		33.9	33.2	33.83	33.8	33.5	33.39						2.33		35.7	35.4	36	35	35.1	35.43
					2.41		33.7	33.1	33.96	34.1	33.6	33.43						2.41		35.8	35.4	35.7	34.8	35	35.37
					2.5		33.35	33.1	33.71	33.9	33.7	33.36						2.5		35.6	35.6	35.7	34.7	34.8	35.33
					2.58		33.1	33.1	33.63	33.9	33.7	33.36						2.58		35.4	35.2	35.5	34.7	34.7	35.15
					2.66		33.1	33.2	33.49	33.7	33.7	33.36						2.66		35.3	35	35.4	34.8	34.7	35.07
					2.75		33.31	33.3	33.5	33.6	33.7	33.39						2.75		35.4	34.8	35.5	34.7	34.6	35.01
					2.83		33.2	33.1	33.39	33.5	33.5	33.23						2.83		35	35.5	35.4	34.8	34.5	35.05
					2.91		33.5	33.3	33.56	33.6	33.5	33.39						2.91		34.9	35.5	35.3	34.7	34.4	34.99
					3		33.6	33	33.46	33.4	33.5	33.13						3		34.9	35.98	35.3	34.7	34.3	35.06
					3.08		33.6	33.4	33.33	33.2	33.4	33.33						3.08		36	37.1	36.5	37	34.8	36.19
					3.16		33.6	33.4	33.33	33.2	33.4	33.33						3.16		37.4	38.8	37.9	37.75	36	37.22
					3.25		33.6	33.7	34.46	34.9	33.9	34.09						3.25		38.6	39.2	38.5	37.75	37	37.64
					3.33		34.1	35.1	35.23	35.8	34.6	35.33						3.33		39.3	39.5	38.9	38.45	37.2	38.16
					3.41		34.6	35.6	35.39	35.8	34.5	35.66						3.41		39.3	39.4	38.7	38.75	37.8	38.4
					3.5		35.1	36.3	35.83	36.2	34.6	36.26						3.5		39.2	39.2	38.6	38.85	38.3	38.54
					3.58		35.1	36.7	35.76	36.1	36.1	36.49						3.58		39	39.3	38.2	38.85	38.7	38.48
					3.66		35.5	36.9	35.83	36	36.1	36.59						3.66		38.8	39	38.5	38.85	39	38.56
					3.75		36.1	37.2	35.96	35.9	36.3	36.76						3.75		38.7	39	38.4	38.75	39.2	38.6
					3.83		36.5	37.2	36.09	35.9	36.7	36.76						3.83		38.7	38.9	38.2	38.75	39	38.62
					3.91		36.7	37.2	36.09	35.8	36.7	36.73						3.91		38.5	38.9	37.7	38.65	38.9	38.52
					4		36.8	37.2	36.06	35.7	36.5	36.69						4		38.3	39	37.4	38.45	38.9	38.44
					4.08		36.7	37.2	36.09	35.8	36.5	36.73						4.08		37.8	39	37.6	38.15	38.7	38.28
					4.16		36.9	37.2	36.09	35.7	36.5	36.69						4.16		37.8	38.9	37.6	38.05	38.6	38.22
					4.25		36.9	37.4	36.29	36	36.3	36.93						4.25		37.9	38.3	37.4	37.95	38.1	38.06
					4.33		36.8	37.3	36.19	35.9	36.3	36.83						4.33		37.7	38.4	37.2	37.75	38	37.92
					4.41		36.9	37.3	36.23	35.9	36.4	36.83						4.41		37.4	38.4	37.3	37.65	38.3	37.84
					4.5		36.9	37.1	36.16	35.8	36.4	36.66						4.5		37.2	38.2	37.8	37.15	38.2	37.66
					4.58		36.9	37.2	36.16	35.8	36.4	36.73						4.58		37.4	38.4	37.4	36.95	38.1	37.6
					4.66		37	37.2	36.06	35.6	36.3	36.66						4.66		37.5	37.8	37.2	36.95	38	37.52
					4.75		36.8	36.8	36.06	35.7	36.5	36.43						4.75		37.4	37.1	37.2	36.65	38.2	37.28
					4.83		36.9	36.8	36.43	36.2	36.7	36.59						4.83		37.4	37.4	37.2	36.75	38	37.34
					4.91		36.7	36.7	36.76	36.8	36.5	36.73						4.91		37	37.9	37	36.75	37.6	37.3
					5		36.7	36.7	36.76	36.8	36.3	36.73						5		36.7	38	36.8	36.75	37.4	37.26
					5.08		36.1	36.5	36.63	36.9	36.3	36.63						5.08		36.2	38	36.7	36.75	37.6	37.1
					5.16		35.8	36.3	36.53	36.9	36.3	36.49						5.16		36.2	37.7	36.7	36.55	37.4	36.92
					5.25		35.7	36.1	36.36	36.7	36.1	36.29						5.25		36	37.2	36.7	36.55	37.6	37.1
					5.33		35.4	35.9	36.26	36.7	36.1	36.16						5.33		35.8	37.2	36.5	36.65	37.1	37.4
					5.41		35.3	35.9	36.16	36.6	36.1	36.13						5.41		35.8	37.2	36.55	36.65	36.92	37.1
					5.5		35.4	35.8	36.06	36.4	35.9	35.99						5.5		36.19	37	36.55	36.55	37	37.4
					5.58		35.1	36.1	36.09	36.6	35.9	36.1						5.58		36.19	36.5	36.8	36.35	37.4	37.28
					5.66		35.4	36.26	36.16	36.4	36.1	35.9						5.66		36.55	36	37	36	37.28	36.8
					5.75		35.3	35.9	36.63	36.63	36.08	35.9						5.75		36.55	36.35	37	36.07	37	37
					5.83		35.9	35.9	36.53	36.26	35.9	36.13						5.83		36.92	36.5	36.7	36.55	37.3	37.1
					5.91		35.9	35.99	36.36	36.4	36.1	35.99						5.91		36.92	36.55	36.55	37.3	37.4	37.3
					6		36.06	35.99	36.16	36.21	36.1	36.1						6		36.7	37	37.1	36.92	37.4	36.72
