# Supplementary material for: Opposing actions of co-released GABA and neurotensin on the activity of preoptic neurons and on body temperature
Source: eLife. 2024 Aug 29;13:RP98677. doi: 10.7554/eLife.98677 (PMC11361704; doi:10.7554/eLife.98677)
Supplement: Figure 7—source data 1. [file elife-98677-fig7-data1.xlsx]

## Sheet: Sheet1
Fig 7A
		Nts-eYFP		Time (h)		M1	M2	M3	M4	M5	M6			Nts-hM3D(Gq)		Time (h)		M7	M8	M9	M10	M11	M12
		(control)
				-2		35.69	35.08	34.78	35.79	35.59	35.15					-2		36.12	36.79	36.46	36.42	35.92	37
				-1.92		35.49	35.28	34.98	35.59	35.39	35.21					-1.92		35.72	36.6	36.16	36.12	35.52	36.8
				-1.84		35.49	35.28	35.18	35.59	35.39	35.28					-1.84		35.72	36.29	36.01	35.97	35.52	36.5
				-1.75		35.49	35.08	35.28	35.59	35.39	35.25					-1.75		36.62	35.9	36.26	36.22	36.42	36.1
				-1.67		36.29	35.08	35.18	36.39	36.19	35.48					-1.67		36.22	35.7	35.96	35.92	36.02	35.9
				-1.59		35.99	34.98	35.18	36.09	35.89	35.35					-1.59		36.92	35.7	36.31	36.27	36.72	35.9
				-1.5		36.29	34.78	35.08	36.39	36.19	35.35					-1.5		37.02	35.5	36.26	36.22	36.82	35.7
				-1.42		36.09	34.78	35.08	36.19	35.99	35.28					-1.42		36.42	35.2	35.81	35.77	36.22	35.4
				-1.34		36.29	34.78	35.08	36.39	36.19	35.35					-1.34		36.42	35.6	36.01	35.97	36.22	35.8
				-1.25		35.88	34.78	35.18	35.98	35.78	35.24					-1.25		36.22	36.2	36.21	36.17	36.02	36.4
				-1.17		36.29	35.28	35.18	36.39	36.19	35.55					-1.17		36.32	35.2	35.76	35.72	36.12	35.4
				-1.09		35.74	35.08	35.08	35.84	35.64	35.26					-1.09		36.32	35.2	35.76	35.72	36.12	35.4
				-1		36.09	34.98	34.98	36.19	35.99	35.31					-1		36.22	35.2	35.71	35.67	36.02	35.4
				-0.92		35.49	35.18	35.18	35.59	35.39	35.25					-0.92		36.02	35.1	35.56	35.52	35.82	35.3
				-0.84		36.19	34.88	35.32	36.29	36.09	35.43					-0.84		36.32	35.2	35.76	35.72	36.12	35.4
				-0.75		36.09	35.08	35.51	36.19	35.99	35.53					-0.75		36.42	34.9	35.66	35.62	36.22	35.1
				-0.67		36.29	34.98	35.42	36.39	36.19	35.53					-0.67		36.22	34.9	35.56	35.52	36.02	35.1
				-0.59		36.09	34.78	35.32	36.19	35.99	35.36					-0.59		36.02	35	35.51	35.47	35.82	35.2
				-0.5		35.89	34.78	35.52	35.99	35.79	35.36					-0.5		36.02	35	35.51	35.47	35.82	35.2
				-0.42		35.89	34.88	35.32	35.99	35.79	35.33					-0.42		35.92	35	35.46	35.42	35.72	35.2
				-0.34		35.69	35.38	35.78	35.79	35.59	35.58					-0.34		36.02	35	35.51	35.47	35.82	35.2
				-0.25		35.69	34.88	34.98	35.79	35.59	35.15					-0.25		36.22	35.2	35.71	35.67	36.02	35.4
				-0.17		35.49	35.08	35.38	35.59	35.39	35.28					-0.17		36.12	35.1	35.61	35.57	35.92	35.3
				-0.09		35.49	34.98	35.18	35.59	35.39	35.18					-0.09		35.92	35.6	35.76	35.72	35.72	35.8
				0		36.29	36.68	36.58	36.4	36.19	36.48					0		36.22	36.1	36.16	36.12	36.02	36.3
				0.08		36.5	36.98	37.08	36.6	36.4	36.81					0.08		36.12	36.6	36.36	36.32	35.92	36.8
				0.16		36.4	37.18	37.08	36.5	36.29	36.85					0.16		36.12	37	36.56	36.52	35.92	37.2
				0.25		36.7	37.03	36.58	36.8	36.6	36.73					0.25		36.72	37	36.86	36.82	36.52	37.2
				0.33		36.4	36.83	36.48	36.5	36.29	36.53					0.33		36.72	36.9	36.81	36.77	36.52	37.1
				0.41		36.29	36.4	36.38	36.4	36.19	36.32					0.41		36.6	36.5	36.54	36.51	36.4	36.7
				0.5		36	35.42	36.08	36.1	35.9	35.8					0.5		36.5	36.9	36.7	36.66	36.29	37.1
				0.58		36.09	34.92	35.88	36.19	35.99	35.59					0.58		36.02	36.9	36.46	36.42	35.82	37.1
				0.66		36.09	34.68	35.78	36.19	35.99	35.48					0.66		35.82	37	36.41	36.37	35.62	37.2
				0.75		35.79	34.92	35.28	35.89	35.69	35.29					0.75		35.82	36.7	36.26	36.22	35.62	36.9
				0.83		35.69	34.82	35.28	35.79	35.59	35.23					0.83		35.52	36.5	36.01	35.97	35.32	36.7
				0.91		35.59	35.02	35.28	35.69	35.49	35.26					0.91		35.82	36.2	36.01	35.97	35.62	36.4
				1		35.49	35.32	35.28	35.59	35.39	35.33					1		35.92	36.2	36.06	36.02	35.72	36.4
				1.08		35.49	35.32	35.18	35.59	35.39	35.29					1.08		35.72	36	35.86	35.82	35.52	36.2
				1.16		35.51	35.24	35.4	35.61	35.41	35.35					1.16		35.82	35.79	35.81	35.77	35.62	36
				1.25		35.51	35.34	35.4	35.61	35.41	35.38					1.25		35.82	35.7	35.76	35.72	35.62	35.9
				1.33		35.61	35.34	35.3	35.71	35.51	35.38					1.33		35.82	35.5	35.66	35.62	35.62	35.7
				1.41		35.51	35.24	35.4	35.61	35.41	35.35					1.41		35.22	34.29	34.76	34.72	35.02	34.5
				1.5		35.51	35.14	35.2	35.61	35.41	35.25					1.5		35.12	33.5	34.31	34.27	34.92	33.7
				1.58		35.31	34.94	35.2	35.41	35.21	35.11					1.58		34.72	33.5	34.11	34.07	34.52	33.7
				1.66		35.21	35	35.5	35.31	35.11	35.2					1.66		34.32	32.79	33.56	33.53	34.12	33
				1.75		35.21	34.7	35.6	35.31	35.11	35.13					1.75		33.62	32.2	32.91	32.88	33.42	32.4
				1.83		35.11	34.8	35.5	35.21	35.01	35.1					1.83		32.92	31.4	32.16	32.13	32.72	31.6
				1.91		35.11	34.7	35.3	35.21	35.01	35					1.91		32.42	31	31.71	31.68	32.22	31.2
				2		35.51	34.7	35.1	35.61	35.41	35.07					2		32.12	30.6	31.36	31.33	31.92	30.8
				2.08		35.51	34.6	35.2	35.61	35.41	35.07					2.08		31.62	30	30.81	30.78	31.42	30.2
				2.16		35.81	34.7	35.3	35.91	35.71	35.23					2.16		31.62	29.8	30.71	30.68	31.42	30
				2.25		36.21	34.6	35.3	36.31	36.11	35.33					2.25		31.42	29.5	30.46	30.43	31.22	29.7
				2.33		36.51	34.6	35.3	36.61	36.41	35.43					2.33		31.42	29.5	30.46	30.43	31.22	29.7
				2.41		36.41	34.6	35.4	36.51	36.31	35.43					2.41		31.42	29.6	30.51	30.48	31.22	29.8
				2.5		36.21	35.1	35.4	36.31	36.11	35.53					2.5		31.32	29.6	30.46	30.43	31.12	29.8
				2.58		36.21	35.14	35.2	36.31	36.11	35.48					2.58		31.32	29.8	30.56	30.53	31.12	30
				2.66		36.11	35.44	35.5	36.21	36.01	35.65					2.66		31.72	29.9	30.81	30.78	31.52	30.1
				2.75		36.11	35.44	36.1	36.21	36.01	35.85					2.75		31.72	29.7	30.71	30.68	31.52	29.9
				2.83		36.11	35.44	35.9	36.21	36.01	35.78					2.83		31.72	29.8	30.76	30.73	31.52	30
				2.91		36.11	35.44	36.1	36.21	36.01	35.85					2.91		31.72	30.1	30.91	30.88	31.52	30.3
				3		36.01	35.34	35.9	36.11	35.91	35.71					3		31.82	30.3	31.06	31.03	31.62	30.5
				3.08		35.91	35.24	35.7	36.01	35.81	35.58					3.08		32.12	30.1	31.11	31.08	31.92	30.3
				3.16		35.91	35.14	35.6	36.01	35.81	35.51					3.16		32.02	30.2	31.11	31.08	31.82	30.4
				3.25		35.81	35.04	35.5	35.91	35.71	35.41					3.25		32.12	30.4	31.26	31.23	31.92	30.6
				3.33		35.71	35.14	35.3	35.81	35.61	35.35					3.33		32.22	30.7	31.46	31.43	32.02	30.9
				3.41		35.61	35.04	35.5	35.71	35.51	35.35					3.41		32.22	30.9	31.56	31.53	32.02	31.1
				3.5		35.61	35.04	35.5	35.71	35.51	35.35					3.5		32.52	31	31.76	31.73	32.32	31.2
				3.58		35.51	35.24	35.4	35.61	35.41	35.35					3.58		32.52	31.4	31.96	31.93	32.32	31.6
				3.66		35.41	34.9	35.3	35.51	35.31	35.17					3.66		32.92	31.3	32.11	32.08	32.72	31.5
				3.75		35.21	34.7	35.2	35.31	35.11	35					3.75		32.92	31.5	32.21	32.18	32.72	31.7
				3.83		35.41	34.7	35.6	35.51	35.31	35.2					3.83		32.92	31.9	32.41	32.38	32.72	32.1
				3.91		35.41	34.8	36.1	35.51	35.31	35.4					3.91		33.32	32.2	32.76	32.73	33.12	32.4
				4		35.51	35	36.1	35.61	35.41	35.5					4		33.42	32.2	32.81	32.78	33.22	32.4
				4.08		35.61	35	36.1	35.71	35.51	35.53					4.08		33.82	32	32.91	32.88	33.62	32.2
				4.16		35.71	34.8	36.2	35.81	35.61	35.53					4.16		34.02	32.2	33.11	33.08	33.82	32.4
				4.25		35.51	34.7	36.4	35.61	35.41	35.5					4.25		34.32	32.29	33.31	33.28	34.12	32.5
				4.33		35.51	34.6	36.3	35.61	35.41	35.43					4.33		34.92	32.4	33.66	33.62	34.72	32.6
				4.41		35.31	34.6	36.1	35.41	35.21	35.3					4.41		34.92	32.4	33.66	33.62	34.72	32.6
				4.5		35.21	34.4	35.9	35.31	35.11	35.13					4.5		35.02	32.5	33.76	33.72	34.82	32.7
				4.58		35.21	34.6	35.8	35.31	35.11	35.17					4.58		35.62	32.7	34.16	34.12	35.42	32.9
				4.66		35.21	34.7	35.7	35.31	35.11	35.17					4.66		35.82	32.9	34.36	34.32	35.62	33.1
				4.75		35.31	34.7	35.5	35.41	35.21	35.13					4.75		35.82	32.9	34.36	34.32	35.62	33.1
				4.83		35.41	34.6	35.8	35.51	35.31	35.23					4.83		35.92	33.1	34.51	34.47	35.72	33.3
				4.91		35.91	34.6	35.9	36.01	35.81	35.43					4.91		36.22	33.1	34.66	34.62	36.02	33.3
				5		36.01	34.8	36.3	36.11	35.91	35.67					5		36.12	33.2	34.66	34.62	35.92	33.4
				5.08		36.01	35.14	36.1	36.11	35.91	35.71					5.08		36.12	33.4	34.76	34.72	35.92	33.6
				5.16		36.01	35.44	35.9	36.11	35.91	35.75					5.16		36.12	33.6	34.86	34.82	35.92	33.8
				5.25		35.91	35.64	35.6	36.01	35.81	35.68					5.25		36.32	33.6	34.96	34.92	36.12	33.8
				5.33		35.81	35.84	35.5	35.91	35.71	35.68					5.33		36.32	33.9	35.11	35.07	36.12	34.1
				5.41		35.51	35.84	35.5	35.61	35.41	35.58					5.41		36.42	34.2	35.31	35.27	36.22	34.4
				5.5		35.51	36.04	35.4	35.61	35.41	35.61					5.5		36.72	34.5	35.61	35.57	36.52	34.7
				5.58		35.51	36.14	35.4	35.61	35.41	35.65					5.58		36.72	34.7	35.71	35.67	36.52	34.9
				5.66		35.51	36.04	35.3	35.61	35.41	35.58					5.66		37.02	34.79	35.91	35.87	36.82	35
				5.75		35.31	35.74	35.2	35.41	35.21	35.38					5.75		37.32	34.9	36.11	36.07	37.12	35.1
				5.83		35.51	35.64	35.2	35.61	35.41	35.41					5.83		37.22	35	36.11	36.07	37.02	35.2
				5.91		35.51	35.44	35.1	35.61	35.41	35.31					5.91		37.22	35	36.11	36.07	37.02	35.2
				6		35.51	35.34	35.6	35.61	35.41	35.45					6		37.32	35.2	36.26	36.22	37.12	35.4
				6.08		35.81	35.24	35.8	35.91	35.71	35.58					6.08		37.32	34.7	36.01	35.97	37.12	34.9
				6.16		36.01	35.14	36.1	36.11	35.91	35.71					6.16		37.12	35.29	36.21	36.17	36.92	35.5
				6.25		36.41	34.94	36.4	36.51	36.31	35.88					6.25		37.12	35.29	36.21	36.17	36.92	35.5
				6.33		36.21	34.74	36.4	36.31	36.11	35.75					6.33		37.32	35.2	36.26	36.22	37.12	35.4
				6.41		36.51	34.64	36.4	36.61	36.41	35.81					6.41		37.32	35.2	36.26	36.22	37.12	35.4
				6.5		36.31	34.54	36.5	36.41	36.21	35.75					6.5		37.22	35.7	36.46	36.42	37.02	35.9
				6.58		36.21	34.64	36.6	36.31	36.11	35.78					6.58		37.22	35.7	36.46	36.42	37.02	35.9
				6.66		36.11	34.54	36.5	36.21	36.01	35.68					6.66		37.22	35.9	36.56	36.52	37.02	36.1
				6.75		36.11	35	36.4	36.21	36.01	35.8					6.75		37.32	35.7	36.51	36.47	37.12	35.9
				6.83		35.91	35.8	36.4	36.01	35.81	36					6.83		37.22	35.6	36.41	36.37	37.02	35.8
				6.91		35.81	35.7	36	35.91	35.71	35.8					6.91		37.52	36.2	36.86	36.82	37.32	36.4
				7		35.81	35.7	36	35.91	35.71	35.8					7		37.32	36.2	36.76	36.72	37.12	36.4
				7.08		35.71	35.6	35.9	35.81	35.61	35.7					7.08		37.22	36.4	36.81	36.77	37.02	36.6
				7.16		35.71	35.8	35.7	35.81	35.61	35.7					7.16		37.52	36.5	37.01	36.97	37.32	36.7
				7.25		35.61	36.2	35.8	35.71	35.51	35.83					7.25		37.32	36.2	36.76	36.72	37.12	36.4
				7.33		35.61	36.6	35.7	35.71	35.51	35.93					7.33		38.02	36.2	37.11	37.07	37.82	36.4
				7.41		35.49	36.28	35.18	35.59	35.39	35.61					7.41		38.02	36.29	37.16	37.12	37.82	36.5
				7.5		36.09	36.48	35.38	36.19	35.99	35.95					7.5		38.12	36.6	37.36	37.32	37.92	36.8
				7.58		36.39	36.48	35.78	36.49	36.29	36.18					7.58		38.12	36.6	37.36	37.32	37.92	36.8
				7.66		35.99	36.28	36.28	36.09	35.89	36.15					7.66		38.02	36.6	37.31	37.27	37.82	36.8
				7.75		35.89	36.08	36.28	35.99	35.79	36.05					7.75		37.92	36.6	37.26	37.22	37.72	36.8
				7.83		35.89	35.98	36.18	35.99	35.79	35.98					7.83		38.22	36.6	37.41	37.37	38.02	36.8
				7.91		35.59	36.18	36.08	35.69	35.49	35.91					7.91		38.42	36.6	37.51	37.47	38.22	36.8
				8		35.59	36.18	36.08	35.69	35.49	35.91					8		38.22	36.7	37.46	37.42	38.02	36.9
Fig 7B			control	Time (h)		M7	M8	M9	M10	M11	M12				NtsR2	Time (h)		M13	M14	M15	M16	M17	M18				NtsR1	Time (h)		M19	M20	M21	M22	M23	M24				NtsR1+	Time (h)		M25	M26	M27	M28	M29	M30
															antag												antag												NtsR2
				-2		36.12	36.79	36.46	36.42	35.92	37					-2		35	35.88	35.2	34.8	35.68	36.08					-2		36.29	35.43	36.09	36.5	35.63	35.23				antag	-2		35.54	35.9	35.33	35.74	36.1	35.7
				-1.92		35.72	36.6	36.16	36.12	35.52	36.8					-1.92		34.93	35.67	35.13	34.73	35.47	35.87					-1.92		36.1	35.35	35.9	36.3	35.55	35.15					-1.92		35.44	35.79	35.23	35.64	36	35.6
				-1.84		35.72	36.29	36.01	35.97	35.52	36.5					-1.84		34.93	35.88	35.13	34.73	35.68	36.08					-1.84		36	36.02	35.79	36.2	36.22	35.82					-1.84		35.33	35.7	35.13	35.54	35.9	35.5
				-1.75		36.62	35.9	36.26	36.22	36.42	36.1					-1.75		35.07	35.74	35.27	34.87	35.54	35.94					-1.75		35.7	35.43	35.5	35.9	35.63	35.23					-1.75		35.33	35.79	35.13	35.54	36	35.6
				-1.67		36.22	35.7	35.96	35.92	36.02	35.9					-1.67		35.51	35.88	35.71	35.3	35.68	36.08					-1.67		35.6	35.35	35.4	35.8	35.55	35.15					-1.67		35.33	35.6	35.13	35.54	35.8	35.4
				-1.59		36.92	35.7	36.31	36.27	36.72	35.9					-1.59		35.51	35.81	35.71	35.3	35.61	36.01					-1.59		35.5	35.87	35.29	35.7	36.07	35.67					-1.59		35.33	35.5	35.13	35.54	35.7	35.3
				-1.5		37.02	35.5	36.26	36.22	36.82	35.7					-1.5		35.72	35.96	35.92	35.52	35.76	36.16					-1.5		35.6	35.87	35.4	35.8	36.07	35.67					-1.5		35.54	35.7	35.33	35.74	35.9	35.5
				-1.42		36.42	35.2	35.81	35.77	36.22	35.4					-1.42		35.87	36.1	36.07	35.67	35.9	36.3					-1.42		35.6	35.94	35.4	35.8	36.14	35.74					-1.42		35.73	35.7	35.53	35.94	35.9	35.5
				-1.34		36.42	35.6	36.01	35.97	36.22	35.8					-1.34		35.07	35.74	35.27	34.87	35.54	35.94					-1.34		35.5	35.94	35.29	35.7	36.14	35.74					-1.34		35.83	35.9	35.63	36.04	36.1	35.7
				-1.25		36.22	36.2	36.21	36.17	36.02	36.4					-1.25		35.07	35.88	35.27	34.87	35.68	36.08					-1.25		35.6	35.43	35.4	35.8	35.63	35.23					-1.25		35.64	35.79	35.44	35.84	36	35.6
				-1.17		36.32	35.2	35.76	35.72	36.12	35.4					-1.17		35.72	35.96	35.92	35.52	35.76	36.16					-1.17		35.6	35.87	35.4	35.8	36.07	35.67					-1.17		35.83	35.7	35.63	36.04	35.9	35.5
				-1.09		36.32	35.2	35.76	35.72	36.12	35.4					-1.09		35.51	35.88	35.71	35.3	35.68	36.08					-1.09		35.5	35.94	35.29	35.7	36.14	35.74					-1.09		35.64	35.5	35.44	35.84	35.7	35.3
				-1		36.22	35.2	35.71	35.67	36.02	35.4					-1		35	36.03	35.2	34.8	35.83	36.23					-1		35.6	35.87	35.4	35.8	36.07	35.67					-1		35.73	35.5	35.53	35.94	35.7	35.3
				-0.92		36.02	35.1	35.56	35.52	35.82	35.3					-0.92		34.93	36.03	35.13	34.73	35.83	36.23					-0.92		35.5	35.35	35.29	35.7	35.55	35.15					-0.92		35.64	35.5	35.44	35.84	35.7	35.3
				-0.84		36.32	35.2	35.76	35.72	36.12	35.4					-0.84		35.07	35.88	35.27	34.87	35.68	36.08					-0.84		35.5	35.65	35.29	35.7	35.85	35.45					-0.84		35.83	35.29	35.63	36.04	35.5	35.1
				-0.75		36.42	34.9	35.66	35.62	36.22	35.1					-0.75		35	35.96	35.2	34.8	35.76	36.16					-0.75		35.5	36.02	35.29	35.7	36.22	35.82					-0.75		35.64	35.29	35.44	35.84	35.5	35.1
				-0.67		36.22	34.9	35.56	35.52	36.02	35.1					-0.67		34.79	35.81	34.99	34.58	35.61	36.01					-0.67		35.6	36.02	35.4	35.8	36.22	35.82					-0.67		35.64	35.1	35.44	35.84	35.3	34.9
				-0.59		36.02	35	35.51	35.47	35.82	35.2					-0.59		35	35.81	35.2	34.8	35.61	36.01					-0.59		35.6	35.87	35.4	35.8	36.07	35.67					-0.59		35.94	35.5	35.73	36.14	35.7	35.3
				-0.5		36.02	35	35.51	35.47	35.82	35.2					-0.5		35	35.81	35.2	34.8	35.61	36.01					-0.5		35.5	35.72	35.29	35.7	35.92	35.52					-0.5		35.64	35.29	35.44	35.84	35.5	35.1
				-0.42		35.92	35	35.46	35.42	35.72	35.2					-0.42		35.07	35.67	35.27	34.87	35.47	35.87					-0.42		35.4	35.57	35.19	35.6	35.77	35.37					-0.42		35.64	35.6	35.44	35.84	35.8	35.4
				-0.34		36.02	35	35.51	35.47	35.82	35.2					-0.34		35.07	35.67	35.27	34.87	35.47	35.87					-0.34		35.5	35.96	35.29	35.7	36.16	35.76					-0.34		35.33	35.2	35.13	35.54	35.4	35
				-0.25		36.22	35.2	35.71	35.67	36.02	35.4					-0.25		34.93	35.67	35.13	34.73	35.47	35.87					-0.25		35.79	35.88	35.59	36	36.08	35.68					-0.25		35.33	35.2	35.13	35.54	35.4	35
				-0.17		36.12	35.1	35.61	35.57	35.92	35.3					-0.17		34.93	35.88	35.13	34.73	35.68	36.08					-0.17		36	35.88	35.79	36.2	36.08	35.68					-0.17		35.64	35.9	35.44	35.84	36.1	35.7
				-0.09		35.92	35.6	35.76	35.72	35.72	35.8					-0.09		34.86	36.32	35.06	34.66	36.11	36.52					-0.09		36	35.81	35.79	36.2	36.01	35.61					-0.09		35.73	36.55	35.53	35.94	36.76	36.36
				0		36.22	36.1	36.16	36.12	36.02	36.3					0		35.38	36.68	35.58	35.18	36.48	36.88					0		35.9	35.81	35.69	36.1	36.01	35.61					0		35.64	36.45	35.44	35.84	36.66	36.26
				0.08		36.12	36.6	36.36	36.32	35.92	36.8					0.08		35.89	36.89	36.09	35.69	36.69	37.09					0.08		36.1	35.81	35.9	36.3	36.01	35.61					0.08		35.54	36.55	35.33	35.74	36.76	36.36
				0.16		36.12	37	36.56	36.52	35.92	37.2					0.16		35.89	36.96	36.09	35.69	36.76	37.16					0.16		36.1	36.03	35.9	36.3	36.23	35.83					0.16		35.64	36.55	35.44	35.84	36.76	36.36
				0.25		36.72	37	36.86	36.82	36.52	37.2					0.25		35.89	37.11	36.09	35.69	36.91	37.31					0.25		36.1	36.03	35.9	36.3	36.23	35.83					0.25		36.17	36.22	35.97	36.37	36.43	36.03
				0.33		36.72	36.9	36.81	36.77	36.52	37.1					0.33		35.96	37.25	36.16	35.76	37.05	37.45					0.33		36.1	36.18	35.9	36.3	36.38	35.98					0.33		36.17	36.52	35.97	36.37	36.73	36.33
				0.41		36.6	36.5	36.54	36.51	36.4	36.7					0.41		35.67	36.96	35.87	35.47	36.76	37.16					0.41		36.1	36.47	35.9	36.3	36.67	36.27					0.41		36.17	36.52	35.97	36.37	36.73	36.33
				0.5		36.5	36.9	36.7	36.66	36.29	37.1					0.5		35.84	37.04	36.04	35.64	36.84	37.24					0.5		36.1	36.55	35.9	36.3	36.75	36.35					0.5		35.97	37.02	35.76	36.17	37.23	36.83
				0.58		36.02	36.9	36.46	36.42	35.82	37.1					0.58		36.08	36.7	36.28	35.88	36.5	36.9					0.58		36	36.61	35.79	36.2	36.81	36.41					0.58		36.07	37.02	35.86	36.27	37.23	36.83
				0.66		35.82	37	36.41	36.37	35.62	37.2					0.66		35.6	36.96	35.8	35.4	36.76	37.16					0.66		36	36.58	35.79	36.2	36.78	36.38					0.66		35.97	36.83	35.76	36.17	37.03	36.63
				0.75		35.82	36.7	36.26	36.22	35.62	36.9					0.75		35.54	36.82	35.74	35.34	36.62	37.02					0.75		36.1	36.54	35.9	36.3	36.74	36.34					0.75		35.97	36.72	35.76	36.17	36.93	36.53
				0.83		35.52	36.5	36.01	35.97	35.32	36.7					0.83		35.38	36.32	35.58	35.18	36.11	36.52					0.83		36	36.47	35.79	36.2	36.67	36.27					0.83		36.17	36.83	35.97	36.37	37.03	36.63
				0.91		35.82	36.2	36.01	35.97	35.62	36.4					0.91		35.53	36.53	35.73	35.33	36.33	36.73					0.91		35.9	36.47	35.69	36.1	36.67	36.27					0.91		36.26	36.62	36.06	36.47	36.83	36.43
				1		35.92	36.2	36.06	36.02	35.72	36.4					1		35.15	36.39	35.35	34.95	36.19	36.59					1		36	36.39	35.79	36.2	36.59	36.19					1		36.07	36.52	35.86	36.27	36.73	36.33
				1.08		35.72	36	35.86	35.82	35.52	36.2					1.08		35.29	36.17	35.49	35.09	35.97	36.37					1.08		36.2	36.21	36	36.4	36.41	36.01					1.08		35.86	36.52	35.66	36.07	36.73	36.33
				1.16		35.82	35.79	35.81	35.77	35.62	36					1.16		35.15	36.1	35.35	34.95	35.9	36.3					1.16		36.29	36.12	36.09	36.5	36.32	35.92					1.16		36.07	36.42	35.86	36.27	36.63	36.23
				1.25		35.82	35.7	35.76	35.72	35.62	35.9					1.25		35.07	36.03	35.27	34.87	35.83	36.23					1.25		35.5	36.33	35.29	35.7	36.53	36.13					1.25		36.17	36.42	35.97	36.37	36.63	36.23
				1.33		35.82	35.5	35.66	35.62	35.62	35.7					1.33		34.93	35.38	35.13	34.73	35.18	35.58					1.33		35.6	36.25	35.4	35.8	36.45	36.05					1.33		36.17	37.02	35.97	36.37	37.23	36.83
				1.41		35.22	34.29	34.76	34.72	35.02	34.5					1.41		34.14	35.24	34.34	33.94	35.04	35.44					1.41		35.7	36.33	35.5	35.9	36.53	36.13					1.41		36.17	37.12	35.97	36.37	37.33	36.93
				1.5		35.12	33.5	34.31	34.27	34.92	33.7					1.5		32.98	34.95	33.19	32.78	34.75	35.15					1.5		35.6	36.18	35.4	35.8	36.38	35.98					1.5		35.97	36.83	35.76	36.17	37.03	36.63
				1.58		34.72	33.5	34.11	34.07	34.52	33.7					1.58		32.98	34.95	33.19	32.78	34.75	35.15					1.58		34.7	36.18	34.5	34.9	36.38	35.98					1.58		36.17	36.62	35.97	36.37	36.83	36.43
				1.66		34.32	32.79	33.56	33.53	34.12	33					1.66		32.63	34.51	32.83	32.43	34.31	34.72					1.66		33.7	35.15	33.5	33.9	35.35	34.95					1.66		36.17	36.42	35.97	36.37	36.63	36.23
				1.75		33.62	32.2	32.91	32.88	33.42	32.4					1.75		32.41	34.51	32.61	32.21	34.31	34.72					1.75		32.9	34.41	32.69	33.1	34.61	34.21					1.75		35.26	35.67	35.06	35.47	35.87	35.47
				1.83		32.92	31.4	32.16	32.13	32.72	31.6					1.83		32.27	33.94	32.47	32.07	33.74	34.14					1.83		32.6	33.75	32.4	32.8	33.95	33.55					1.83		34.67	35.67	34.47	34.87	35.87	35.47
				1.91		32.42	31	31.71	31.68	32.22	31.2					1.91		31.98	33.29	32.18	31.78	33.09	33.49					1.91		32.5	33.45	32.29	32.7	33.65	33.25					1.91		34.47	34.97	34.26	34.67	35.17	34.77
				2		32.12	30.6	31.36	31.33	31.92	30.8					2		32.05	32.64	32.25	31.85	32.44	32.84					2		32.4	33.16	32.19	32.6	33.36	32.96					2		34.47	34.9	34.26	34.67	35.1	34.7
				2.08		31.62	30	30.81	30.78	31.42	30.2					2.08		31.98	32.14	32.18	31.78	31.94	32.34					2.08		32.4	33.16	32.19	32.6	33.36	32.96					2.08		34.16	34.6	33.96	34.36	34.8	34.4
				2.16		31.62	29.8	30.71	30.68	31.42	30					2.16		32.12	32	32.32	31.92	31.8	32.2					2.16		32.5	33.16	32.29	32.7	33.36	32.96					2.16		34.16	34.4	33.96	34.36	34.6	34.2
				2.25		31.42	29.5	30.46	30.43	31.22	29.7					2.25		32.12	31.78	32.32	31.92	31.58	31.98					2.25		32.54	33.16	32.34	32.75	33.36	32.96					2.25		33.97	34.5	33.76	34.17	34.7	34.3
				2.33		31.42	29.5	30.46	30.43	31.22	29.7					2.33		32.19	31.71	32.39	31.99	31.51	31.91					2.33		32.7	33.23	32.5	32.9	33.43	33.03					2.33		34.07	34.6	33.86	34.27	34.8	34.4
				2.41		31.42	29.6	30.51	30.48	31.22	29.8					2.41		32.12	31.85	32.32	31.92	31.65	32.05					2.41		32.79	33.16	32.59	33	33.36	32.96					2.41		34.16	34.6	33.96	34.36	34.8	34.4
				2.5		31.32	29.6	30.46	30.43	31.12	29.8					2.5		32.19	31.92	32.39	31.99	31.72	32.12					2.5		32.9	33.08	32.69	33.1	33.28	32.88					2.5		34.26	34.9	34.06	34.47	35.1	34.7
				2.58		31.32	29.8	30.56	30.53	31.12	30					2.58		32.27	32	32.47	32.07	31.8	32.2					2.58		33	33.16	32.79	33.2	33.36	32.96					2.58		34.16	35	33.96	34.36	35.2	34.8
				2.66		31.72	29.9	30.81	30.78	31.52	30.1					2.66		32.05	32	32.25	31.85	31.8	32.2					2.66		33.2	33.45	33	33.4	33.65	33.25					2.66		34.07	35.1	33.86	34.27	35.3	34.9
				2.75		31.72	29.7	30.71	30.68	31.52	29.9					2.75		32.19	32.36	32.39	31.99	32.15	32.56					2.75		33.33	33.52	33.12	33.53	33.72	33.32					2.75		34.26	35.2	34.06	34.47	35.4	35
				2.83		31.72	29.8	30.76	30.73	31.52	30					2.83		32.19	32.36	32.39	31.99	32.15	32.56					2.83		33.6	32.99	33.4	33.8	33.19	32.79					2.83		34.36	35.29	34.16	34.57	35.5	35.1
				2.91		31.72	30.1	30.91	30.88	31.52	30.3					2.91		32.34	32.5	32.54	32.14	32.3	32.7					2.91		33.79	33.12	33.59	34	33.33	32.92					2.91		34.36	35.29	34.16	34.57	35.5	35.1
				3		31.82	30.3	31.06	31.03	31.62	30.5					3		32.34	32.64	32.54	32.14	32.44	32.84					3		34	33.17	33.79	34.2	33.37	32.97					3		34.57	35.29	34.36	34.77	35.5	35.1
				3.08		32.12	30.1	31.11	31.08	31.92	30.3					3.08		32.19	32.86	32.39	31.99	32.66	33.06					3.08		34.2	33.24	34	34.4	33.44	33.04					3.08		34.66	35.4	34.46	34.86	35.6	35.2
				3.16		32.02	30.2	31.11	31.08	31.82	30.4					3.16		32.41	32.93	32.61	32.21	32.73	33.13					3.16		34.29	33.29	34.09	34.5	33.49	33.09					3.16		34.76	35.5	34.56	34.97	35.7	35.3
				3.25		32.12	30.4	31.26	31.23	31.92	30.6					3.25		32.63	33	32.83	32.43	32.8	33.2					3.25		34.35	33.66	34.15	34.55	33.86	33.46					3.25		34.97	35.7	34.76	35.17	35.9	35.5
				3.33		32.22	30.7	31.46	31.43	32.02	30.9					3.33		32.55	33.15	32.75	32.35	32.95	33.35					3.33		34.4	33.81	34.19	34.6	34.01	33.61					3.33		35.4	35.79	35.19	35.6	36	35.6
				3.41		32.22	30.9	31.56	31.53	32.02	31.1					3.41		32.7	33.15	32.9	32.5	32.95	33.35					3.41		34.5	33.81	34.29	34.7	34.01	33.61					3.41		35.16	35.79	34.96	35.36	36	35.6
				3.5		32.52	31	31.76	31.73	32.32	31.2					3.5		32.77	33.22	32.97	32.57	33.02	33.42					3.5		34.5	33.81	34.29	34.7	34.01	33.61					3.5		35.47	35.97	35.26	35.67	36.17	35.77
				3.58		32.52	31.4	31.96	31.93	32.32	31.6					3.58		32.91	33.22	33.11	32.71	33.02	33.42					3.58		34.54	33.95	34.34	34.75	34.15	33.75					3.58		35.86	35.17	35.66	36.07	35.37	34.97
				3.66		32.92	31.3	32.11	32.08	32.72	31.5					3.66		32.84	33.36	33.04	32.64	33.16	33.56					3.66		34.65	34.03	34.44	34.85	34.23	33.83					3.66		35.66	35.47	35.46	35.86	35.67	35.27
				3.75		32.92	31.5	32.21	32.18	32.72	31.7					3.75		32.91	33.36	33.11	32.71	33.16	33.56					3.75		34.7	34.03	34.5	34.9	34.23	33.83					3.75		35.76	35.17	35.56	35.97	35.37	34.97
				3.83		32.92	31.9	32.41	32.38	32.72	32.1					3.83		32.91	33.44	33.11	32.71	33.24	33.64					3.83		34.77	34.1	34.57	34.97	34.3	33.9					3.83		35.64	35.34	35.44	35.84	35.54	35.14
				3.91		33.32	32.2	32.76	32.73	33.12	32.4					3.91		32.98	33.51	33.19	32.78	33.31	33.71					3.91		34.9	34.17	34.69	35.1	34.37	33.97					3.91		36.04	35.44	35.83	36.24	35.64	35.24
				4		33.42	32.2	32.81	32.78	33.22	32.4					4		33.13	33.51	33.33	32.93	33.31	33.71					4		35	34.25	34.79	35.2	34.45	34.05					4		36.04	35.64	35.83	36.24	35.84	35.44
				4.08		33.82	32	32.91	32.88	33.62	32.2					4.08		33.13	33.65	33.33	32.93	33.45	33.85					4.08		35.04	34.32	34.84	35.25	34.52	34.12					4.08		36.04	35.64	35.83	36.24	35.84	35.44
				4.16		34.02	32.2	33.11	33.08	33.82	32.4					4.16		33.13	33.58	33.33	32.93	33.38	33.78					4.16		35.1	34.47	34.9	35.3	34.67	34.27					4.16		35.71	35.64	35.51	35.91	35.84	35.44
				4.25		34.32	32.29	33.31	33.28	34.12	32.5					4.25		33.27	33.79	33.47	33.07	33.59	34					4.25		35.25	34.17	35.04	35.45	34.37	33.97					4.25		35.9	35.74	35.7	36.11	35.94	35.54
				4.33		34.92	32.4	33.66	33.62	34.72	32.6					4.33		33.35	33.79	33.55	33.15	33.59	34					4.33		35.29	33.76	35.09	35.5	33.97	33.56					4.33		35.9	35.84	35.7	36.11	36.04	35.64
				4.41		34.92	32.4	33.66	33.62	34.72	32.6					4.41		33.35	33.72	33.55	33.15	33.52	33.92					4.41		35.5	34.47	35.29	35.7	34.67	34.27					4.41		36.11	35.64	35.9	36.31	35.84	35.44
				4.5		35.02	32.5	33.76	33.72	34.82	32.7					4.5		33.42	33.79	33.62	33.22	33.59	34					4.5		35.6	34.69	35.4	35.8	34.89	34.49					4.5		36.21	35.84	36.01	36.41	36.04	35.64
				4.58		35.62	32.7	34.16	34.12	35.42	32.9					4.58		33.7	33.87	33.9	33.5	33.67	34.07					4.58		35.6	34.62	35.4	35.8	34.82	34.42					4.58		36.21	35.74	36.01	36.41	35.94	35.54
				4.66		35.82	32.9	34.36	34.32	35.62	33.1					4.66		33.63	33.94	33.83	33.43	33.74	34.14					4.66		35.6	34.69	35.4	35.8	34.89	34.49					4.66		36.31	35.94	36.11	36.51	36.14	35.74
				4.75		35.82	32.9	34.36	34.32	35.62	33.1					4.75		33.7	34.51	33.9	33.5	34.31	34.72					4.75		35.79	35.45	35.59	36	35.65	35.25					4.75		36.31	36.04	36.11	36.51	36.24	35.84
				4.83		35.92	33.1	34.51	34.47	35.72	33.3					4.83		33.99	34.51	34.19	33.79	34.31	34.72					4.83		35.9	34.49	35.69	36.1	34.69	34.29					4.83		36.31	36.04	36.11	36.51	36.24	35.84
				4.91		36.22	33.1	34.66	34.62	36.02	33.3					4.91		34.14	34.59	34.34	33.94	34.39	34.79					4.91		36	35.22	35.79	36.2	35.42	35.02					4.91		36.31	35.94	36.11	36.51	36.14	35.74
				5		36.12	33.2	34.66	34.62	35.92	33.4					5		34.35	34.66	34.55	34.15	34.46	34.86					5		36.2	34.98	36	36.4	35.18	34.78					5		36.31	36.04	36.11	36.51	36.24	35.84
				5.08		36.12	33.4	34.76	34.72	35.92	33.6					5.08		34.5	34.66	34.7	34.3	34.46	34.86					5.08		36.29	35.28	36.09	36.5	35.48	35.08					5.08		36.31	35.94	36.11	36.51	36.14	35.74
				5.16		36.12	33.6	34.86	34.82	35.92	33.8					5.16		34.64	34.66	34.84	34.44	34.46	34.86					5.16		36.29	35.28	36.09	36.5	35.48	35.08					5.16		36.21	36.04	36.01	36.41	36.24	35.84
				5.25		36.32	33.6	34.96	34.92	36.12	33.8					5.25		34.71	35.52	34.91	34.51	35.32	35.72					5.25		36.4	35.28	36.19	36.6	35.48	35.08					5.25		36.31	36.14	36.11	36.51	36.34	35.94
				5.33		36.32	33.9	35.11	35.07	36.12	34.1					5.33		34.71	35.81	34.91	34.51	35.61	36.01					5.33		36.6	35.28	36.4	36.8	35.48	35.08					5.33		36.4	36.14	36.2	36.61	36.34	35.94
				5.41		36.42	34.2	35.31	35.27	36.22	34.4					5.41		35.15	35.81	35.35	34.95	35.61	36.01					5.41		36.4	35.35	36.19	36.6	35.55	35.15					5.41		36.64	36.07	36.44	36.84	36.27	35.87
				5.5		36.72	34.5	35.61	35.57	36.52	34.7					5.5		35.15	36.1	35.35	34.95	35.9	36.3					5.5		36.6	35.72	36.4	36.8	35.92	35.52					5.5		36.54	35.97	36.33	36.74	36.17	35.77
				5.58		36.72	34.7	35.71	35.67	36.52	34.9					5.58		35.15	36.1	35.35	34.95	35.9	36.3					5.58		36.7	35.8	36.5	36.9	36	35.6					5.58		36.44	35.77	36.23	36.64	35.97	35.57
				5.66		37.02	34.79	35.91	35.87	36.82	35					5.66		35.36	36.46	35.56	35.16	36.26	36.66					5.66		36.7	35.87	36.5	36.9	36.07	35.67					5.66		36.44	35.77	36.23	36.64	35.97	35.57
				5.75		37.32	34.9	36.11	36.07	37.12	35.1					5.75		35.51	36.46	35.71	35.3	36.26	36.66					5.75		36.7	35.72	36.5	36.9	35.92	35.52					5.75		36.44	35.77	36.23	36.64	35.97	35.57
				5.83		37.22	35	36.11	36.07	37.02	35.2					5.83		35.58	35.81	35.78	35.38	35.61	36.01					5.83		36.79	35.87	36.59	37	36.07	35.67					5.83		36.64	35.87	36.44	36.84	36.07	35.67
				5.91		37.22	35	36.11	36.07	37.02	35.2					5.91		35.79	36.1	35.99	35.59	35.9	36.3					5.91		36.79	35.72	36.59	37	35.92	35.52					5.91		36.64	36.7	36.44	36.84	36.9	36.5
				6		37.32	35.2	36.26	36.22	37.12	35.4					6		35.36	36.1	35.56	35.16	35.9	36.3					6		36.79	35.8	36.59	37	36	35.6					6		36.44	36.7	36.23	36.64	36.9	36.5
				6.08		37.32	34.7	36.01	35.97	37.12	34.9					6.08		35.51	35.62	35.71	35.3	35.42	35.82					6.08		36.7	35.72	36.5	36.9	35.92	35.52					6.08		36.33	36.6	36.13	36.54	36.8	36.4
				6.16		37.12	35.29	36.21	36.17	36.92	35.5					6.16		34.9	35.62	35.1	34.7	35.42	35.82					6.16		36.9	36.02	36.69	37.1	36.22	35.82					6.16		36.54	36.7	36.33	36.74	36.9	36.5
				6.25		37.12	35.29	36.21	36.17	36.92	35.5					6.25		35.19	36.06	35.39	34.99	35.86	36.26					6.25		37	35.94	36.79	37.2	36.14	35.74					6.25		36.54	36.5	36.33	36.74	36.7	36.3
				6.33		37.32	35.2	36.26	36.22	37.12	35.4					6.33		35.19	36.06	35.39	34.99	35.86	36.26					6.33		37	36.09	36.79	37.2	36.29	35.89					6.33		36.64	36.9	36.44	36.84	37.1	36.7
				6.41		37.32	35.2	36.26	36.22	37.12	35.4					6.41		35.15	36.06	35.35	34.95	35.86	36.26					6.41		37	36.24	36.79	37.2	36.44	36.04					6.41		36.54	37	36.33	36.74	37.2	36.8
				6.5		37.22	35.7	36.46	36.42	37.02	35.9					6.5		35.15	35.62	35.35	34.95	35.42	35.82					6.5		37.1	36.31	36.9	37.3	36.51	36.11					6.5		36.54	36.9	36.33	36.74	37.1	36.7
				6.58		37.22	35.7	36.46	36.42	37.02	35.9					6.58		35.36	35.62	35.56	35.16	35.42	35.82					6.58		37	36.31	36.79	37.2	36.51	36.11					6.58		36.54	37.29	36.33	36.74	37.5	37.1
				6.66		37.22	35.9	36.56	36.52	37.02	36.1					6.66		35.89	36.06	36.09	35.69	35.86	36.26					6.66		37	36.39	36.79	37.2	36.59	36.19					6.66		36.54	36.9	36.33	36.74	37.1	36.7
				6.75		37.32	35.7	36.51	36.47	37.12	35.9					6.75		35.7	36.06	35.9	35.5	35.86	36.26					6.75		37	36.31	36.79	37.2	36.51	36.11					6.75		36.64	36.9	36.44	36.84	37.1	36.7
				6.83		37.22	35.6	36.41	36.37	37.02	35.8					6.83		36.16	36.59	36.36	35.96	36.39	36.79					6.83		37	36.39	36.79	37.2	36.59	36.19					6.83		36.64	36.9	36.44	36.84	37.1	36.7
				6.91		37.52	36.2	36.86	36.82	37.32	36.4					6.91		36.16	36.8	36.36	35.96	36.6	37					6.91		37	36.53	36.79	37.2	36.73	36.33					6.91		36.64	36.9	36.44	36.84	37.1	36.7
				7		37.32	36.2	36.76	36.72	37.12	36.4					7		36.02	36.95	36.22	35.82	36.75	37.15					7		37	36.68	36.79	37.2	36.88	36.48					7		36.44	36.9	36.23	36.64	37.1	36.7
				7.08		37.22	36.4	36.81	36.77	37.02	36.6					7.08		35.87	36.34	36.07	35.67	36.14	36.54					7.08		37.1	36.68	36.9	37.3	36.88	36.48					7.08		36.44	36.79	36.23	36.64	37	36.6
				7.16		37.52	36.5	37.01	36.97	37.32	36.7					7.16		36.09	36.63	36.29	35.89	36.43	36.83					7.16		37.1	36.75	36.9	37.3	36.95	36.55					7.16		36.44	36.7	36.23	36.64	36.9	36.5
				7.25		37.32	36.2	36.76	36.72	37.12	36.4					7.25		36.09	36.63	36.29	35.89	36.43	36.83					7.25		37.1	36.75	36.9	37.3	36.95	36.55					7.25		36.64	36.79	36.44	36.84	37	36.6
				7.33		38.02	36.2	37.11	37.07	37.82	36.4					7.33		36.09	36.59	36.29	35.89	36.39	36.79					7.33		37.2	37	37	37.4	37.2	36.79					7.33		36.64	37	36.44	36.84	37.2	36.8
				7.41		38.02	36.29	37.16	37.12	37.82	36.5					7.41		36.09	36.59	36.29	35.89	36.39	36.79					7.41		37.29	37.1	37.09	37.5	37.3	36.9					7.41		36.44	36.79	36.23	36.64	37	36.6
				7.5		38.12	36.6	37.36	37.32	37.92	36.8					7.5		36.16	37.12	36.36	35.96	36.92	37.32					7.5		37.1	37.1	36.9	37.3	37.3	36.9					7.5		36.23	36.79	36.03	36.44	37	36.6
				7.58		38.12	36.6	37.36	37.32	37.92	36.8					7.58		36.16	37.12	36.36	35.96	36.92	37.32					7.58		37.1	37.1	36.9	37.3	37.3	36.9					7.58		36.44	36.79	36.23	36.64	37	36.6
				7.66		38.02	36.6	37.31	37.27	37.82	36.8					7.66		36.09	37.12	36.29	35.89	36.92	37.32					7.66		37.29	37	37.09	37.5	37.2	36.79					7.66		36.44	36.9	36.23	36.64	37.1	36.7
				7.75		37.92	36.6	37.26	37.22	37.72	36.8					7.75		36.02	37.19	36.22	35.82	36.99	37.39					7.75		36.9	37.1	36.69	37.1	37.3	36.9					7.75		36.44	36.9	36.23	36.64	37.1	36.7
				7.83		38.22	36.6	37.41	37.37	38.02	36.8					7.83		36.23	37.19	36.43	36.03	36.99	37.39					7.83		36.79	37.1	36.59	37	37.3	36.9					7.83		36.54	36.9	36.33	36.74	37.1	36.7
				7.91		38.42	36.6	37.51	37.47	38.22	36.8					7.91		36.38	37.19	36.58	36.18	36.99	37.39					7.91		36.99	37.1	36.79	37.19	37.3	36.9					7.91		36.44	36.9	36.23	36.64	37.1	36.7
				8		38.22	36.7	37.46	37.42	38.02	36.9					8		36.23	37.12	36.43	36.03	36.92	37.32					8		37.6	37.28	37.4	37.8	37.48	37.08					8		36.64	37	36.44	36.84	37.2	36.8
Fig 7D	firing rates (Hz)			control			% increase with CNO
				normalized %
			cell1	7.2674			733.333
			cell2	72.6744			300
			cell3	191.376			230.38
			cell4	125.969			296.154
			cell5	186.531			211.688
			cell6	55.7171			413.043
			cell7	162.306			168.657
			cell8	99.3217			307.317
			cell9	1.2112			1100
			cell10	101.2			421.1
Fig 7F	EPSC freq (Hz)
				control		% increase with CNO			% increase with CNO+NtsR1 antag				% increase with CNO+NtsR2 antag
				normalized %
			cell1	47.1014			192.308			161.538				176.154
			cell2	76.087			347.619			357.143				280.952
			cell3	112.319			425.807			390.323				318.387
			cell4	159.42			361.364			322.727				256.818
			cell5	105.073			234.483			179.31				196.552
Fig 7G	EPSC amplit (pA)
				control		% increase with CNO			% increase with CNO+NtsR1 antag				% increase with CNO+NtsR2 antag
				normalized %
			cell1	154.412			171.429			152.381				109.524
			cell2	88.2353			266.667			208.333				116.667
			cell3	66.1765			244.444			277.778				211.111
			cell4	102.941			192.857			171.429				178.571
			cell5	88.2353			258.333			225				133.333
Fig 7H	IPSC freq (Hz)
				control		% increase with CNO			% increase with CNO+NtsR1 antag				% increase with CNO+NtsR2 antag
				normalized %
			cell1	20.202			625			332.5				475
			cell2	50.5051			360			240				320
			cell3	126.263			612			360.4				596
			cell4	207.071			387.805			273.902				321.951
			cell5	95.9596			363.158			205.263				347.368
Fig 7I	IPSC amplit (pA)
				control		% increase with CNO			% increase with CNO+NtsR1 antag				% increase with CNO+NtsR2 antag
				normalized %
			cell1	92.3077			136.667			141.667				158.333
			cell2	123.077			162.5			87.5				168.75
			cell3	61.5385			211.25			187.5				258.75
			cell4	138.462			161.111			94.4444				138.889
			cell5	85.3846			200.901			189.189				198.198
